# Supplementary material for: Iodine catalyzed one-pot diamination of glycals with chloramine-T: a new approach to 2-amino-β-glycosylamines for applications in N-glycopeptide synthesis
Source: Royal Society of Chemistry journal article supplement (doi:10.1039/b612151a), 2006-01-01

## Supplementary Information

### **Iodine catalyzed one-pot diamination of glycals with chloramine-T: a new approach to 2-amino- $\beta$ -glycosylamines for applications in *N*-glycopeptide synthesis**

Vipin Kumar and Namakkal G. Ramesh\*

*Department of Chemistry, Indian Institute of Technology - Delhi, Hauz Khas, New Delhi, India 110016.*

E-mail: [ramesh@chemistry.iitd.ac.in](mailto:ramesh@chemistry.iitd.ac.in)

#### **General consideration:**

All solvents were purified using standard procedures. Chloramine-T purchased from Aldrich or Fluka Chemicals only was used for consistency of results. Thin-layer chromatography (TLC) was performed on Merck silica gel pre-coated on aluminium plates. Flash column chromatography was performed on 230-400 mesh silica gel. Optical rotations were recorded on an Autopol II or Autopol V (Rudolph Research Flanders, New Jersey) instrument. All the rotations were measured at 589 nm (sodium D' line). Melting points of the compounds are uncorrected. IR spectra were taken within the range 4000-400  $\text{cm}^{-1}$  as KBr pellets on a Nicolet (Madison, USA) FT-IR spectrophotometer (Model Protege 460). All the  $^1\text{H}$  and  $^{13}\text{C}$  NMR spectra were recorded on a 300 MHz Bruker Spectrospin DPX FT-NMR. Chemical shifts are reported as  $\delta$  values (ppm) relative to internal standard  $\text{Me}_4\text{Si}$ . Elemental analyses were performed on a Perkin Elmer 2400 series II analyzer. Mass spectra were recorded using Waters Micro Mass Q-TOF instrument.

#### **General procedure for disulfonamidation of Glycals:**

To a 0 °C stirred suspension of glycal (1 equiv.), chloramine-T (2.3 equiv.) in acetonitrile taken in a dried 100 mL round-bottomed flask, was added catalytic amount of iodine (15 mol%) and the reaction mixture was allowed to stir at 0°C until the reaction was complete (as indicated by tlc). The reaction mixture was diluted with  $\text{CHCl}_3$  and stirred for additional 5 min. It was then transferred into a separating funnel containing aq.

sodium thiosulfate solution and shaken vigorously. The organic layer was separated and the remaining aqueous layer was washed with more amount of  $\text{CHCl}_3$ . The combined organic layer was then washed with brine solution and dried over anhydrous sodium sulfate and concentrated. The product was purified by flash chromatography.

**3,4,6-Tri-*O*-acetyl-1,2-dideoxy-1,2-di-(*p*-toluenesulfonamido)- $\beta$ -D-glucopyranose 7.**

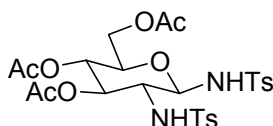

7

7.76 g of **7** was obtained from the reaction of tri-*O*-acetyl-D-glucal **6** (5.00 g, 18.38 mmol) with chloramine-T (11.91 g, 42.27 mmol) and iodine (0.701 g, 2.76 mmol) in  $\text{CH}_3\text{CN}$  (50 mL) in 14 h as per the general procedure. Flash chromatography of the crude reaction mixture was performed with Hexane: Ethyl acetate (2:1). Yield 69%; white solid; mp 191-192 °C (recrystallized from hot benzene);  $[\alpha]_D^{28} +27.2$  ( $c$  1.12 in  $\text{CHCl}_3$ ); Anal. Calcd. for  $\text{C}_{26}\text{H}_{32}\text{N}_2\text{O}_{11}\text{S}_2$ : Found: C, 50.97; H, 5.24; N, 4.78. requires C, 50.97; H, 5.26; N, 4.57; IR (KBr):  $\nu$  3286.1, 2927.4, 1744.9, 1599.1, 1456.8, 1368.1, 1329.4, 1242.2, 1162.4, 1090.8, 1071.9, 1044.3, 817.2, 672.5  $\text{cm}^{-1}$ ;  $^1\text{H}$  NMR (300 MHz,  $\text{CDCl}_3$ ):  $\delta$  7.82 (2 H, d,  $J = 8.2$  Hz), 7.71 (2 H, d,  $J = 8.2$  Hz), 7.32 (2 H, d,  $J = 8.0$  Hz), 7.29 (2 H, d,  $J = 8.0$  Hz), 6.35 (1 H, d,  $J = 7.4$  Hz, NH, exchangeable with  $\text{D}_2\text{O}$ ), 5.34 (1 H, d,  $J = 8.1$  Hz, NH, exchangeable with  $\text{D}_2\text{O}$ ), 4.97-4.87 (2 H, m), 4.67 (1 H, dd,  $J = 8.7, 7.8$  Hz), 4.14 (1 H, dd,  $J = 12.3, 4.8$  Hz), 3.96 (1 H, dd,  $J = 12.3, 1.8$  Hz), 3.67-3.63 (1 H, m), 3.40 (1 H, q,  $J = 9.2$  Hz), 2.43 (3 H, s), 2.42 (3 H, s), 2.06 (3 H, s), 1.97 (3 H, s), 1.48 (3 H, s);  $^{13}\text{C}$  NMR (75 MHz,  $\text{CDCl}_3$ ):  $\delta$  171.11 (s), 170.51 (s), 169.39 (s), 143.81 (s), 143.56 (s), 138.15 (s), 137.64 (s), 129.83 (d), 129.38 (d), 127.23 (d), 127.08 (d), 83.59 (d), 72.88 (2 x d), 68.26 (d), 61.72 (t), 56.64 (d), 21.44 (q), 20.61 (q), 20.45 (q), 19.99 (q).

**3,4,6-Tri-*O*-benzyl-1,2-dideoxy-1,2-di-(*p*-toluenesulfonamido)- $\beta$ -D-glucopyranose 9.**

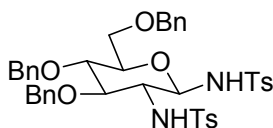

9

5.18 g of **9** was obtained from the reaction of tri-*O*-benzyl-D-glucal **8** (5.00 g, 12.02 mmol) with chloramine-T (7.79 g, 27.65 mmol) and iodine (0.457 g, 1.80 mmol) in CH<sub>3</sub>CN (40 mL) in 13 h as per the general procedure. Flash chromatography of the crude reaction mixture was performed with Hexane: Ethyl acetate (3:1). Yield 57%; white solid; mp 124 °C (recrystallized from hot benzene);  $[\alpha]_D^{28} +18.3$  (*c* 2.29 in acetone); Anal. Calcd. for C<sub>41</sub>H<sub>44</sub>N<sub>2</sub>O<sub>8</sub>S<sub>2</sub>: Found: C, 65.18; H, 5.79; N, 4.01. requires C, 65.08; H, 5.82; N, 3.70; IR (KBr):  $\nu$  3265.9, 2869.1, 2361.5, 1456.3, 1326.6, 1160.2, 1089.8, 1062.6, 698.1, 675.9 cm<sup>-1</sup>; <sup>1</sup>H NMR (300 MHz, CDCl<sub>3</sub>):  $\delta$  7.80 (2 H, d, *J* = 8.1 Hz), 7.68 (2 H, d, *J* = 8.1 Hz), 7.29-7.18 (13 H, m), 7.08 (2 H, d, *J* = 8.1 Hz), 7.04-6.98 (4 H, m), 6.21 (1 H, d, *J* = 7.8 Hz, *NH*, exchangeable with D<sub>2</sub>O), 4.86 (1 H, d, *J* = 7.7 Hz, *NH*, exchangeable with D<sub>2</sub>O), 4.63-4.58 (3 H, m), 4.52 (1 H, d, *J* = 11.4 Hz), 4.47-4.41 (2 H, m), 4.30 (1 H, d, *J* = 12.1 Hz), 3.59 (2 H, dd, *J* = 9.1, 8.7 Hz), 3.43-3.38 (3 H, m), 3.30 (1 H, ddd, *J* = 9.3, 8.7, 8.4 Hz), 2.36 (3 H, s), 2.30 (3 H, s); <sup>13</sup>C NMR (75 MHz, CDCl<sub>3</sub>):  $\delta$  143.82 (s), 143.59 (s), 139.18 (s), 138.37 (s), 138.19 (s), 137.91 (s), 129.95 (d), 129.69 (d), 129.30 (d), 128.77 (d), 128.71 (d), 128.5 (d), 128.09 (d), 127.86 (d), 127.52 (d), 84.36 (d), 82.51 (d), 78.73 (d), 76.57 (d), 75.48 (t), 75.04 (t), 73.97 (t), 68.72 (t), 58.40 (d), 21.91 (q); HRMS (ESI): [M+Na]<sup>+</sup>, Found: 779.2439, C<sub>41</sub>H<sub>44</sub>N<sub>2</sub>O<sub>8</sub>S<sub>2</sub>Na requires 779.2437.

**1,2-Dideoxy-3,4,6-tri-*O*-methyl-1,2-di-(*p*-toluenesulfonamido)- $\beta$ -D-glucopyranose **11**.**

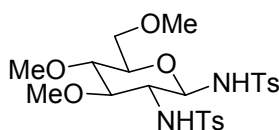

**11**

4.38 g of **11** was obtained from the reaction of tri-*O*-methyl-D-glucal **10** (2.60 g, 13.83 mmol) with chloramine-T (8.96 g, 31.81 mmol) and iodine (0.526 g, 2.07 mmol) in CH<sub>3</sub>CN (40 mL) in 13 h as per the general procedure. Flash chromatography of the crude reaction mixture was performed with Hexane: Ethyl acetate (2:1). Yield 60%; white solid; mp 180-181 °C (recrystallized from hot benzene);  $[\alpha]_D^{28} +38.3$  (*c* 1.62 in CHCl<sub>3</sub>); Anal. Calcd. for C<sub>23</sub>H<sub>32</sub>N<sub>2</sub>O<sub>8</sub>S<sub>2</sub>: Found: C, 52.08; H, 6.13; N, 5.34. requires C, 52.26; H, 6.10; N, 5.30; IR (KBr):  $\nu$  3303.2, 3282.5, 2986.8, 2934.3, 2837.2, 1458.4, 1330.6,

1314.8, 1159.4, 1090.7, 1068.1, 895.9, 813.7, 675.8  $\text{cm}^{-1}$ ;  $^1\text{H}$  NMR (300 MHz,  $\text{CDCl}_3$ ):  $\delta$  7.82 (2 H, d,  $J = 8.2$  Hz), 7.76 (2 H, d,  $J = 8.2$  Hz), 7.31-7.26 (4 H, m), 6.01 (1 H, d,  $J = 8.0$  Hz, NH, exchangeable with  $\text{D}_2\text{O}$ ), 5.11 (1 H, d,  $J = 8.0$  Hz, NH, exchangeable with  $\text{D}_2\text{O}$ ), 4.59 (1 H, t,  $J = 8.6$  Hz), 3.45 (1 H, dd,  $J = 10.8, 3.0$  Hz), 3.40 (3 H, s), 3.31 (1 H, dd,  $J = 10.8, 1.8$  Hz), 3.23 (4 H, m, with one of the methyl protons superimposed), 3.15 (4 H, with one of the methyl protons superimposed), 3.11-2.98 (2 H, m), 2.42 (3 H, s), 2.41 (3 H, s);  $^{13}\text{C}$  NMR (75 MHz,  $\text{CDCl}_3$ ):  $\delta$  143.18 (s), 143.11 (s), 138.53 (s), 137.65 (s), 129.28 (d), 129.13 (d), 127.39 (d), 127.16 (d), 84.26 (d), 83.48 (d), 79.38 (d), 75.62 (d), 70.20 (t), 60.45 (q), 59.87 (q), 58.97 (q), 57.75 (d), 21.42 (q).

### 3,4-Di-*O*-acetyl-1,2-dideoxy-1,2-di-(*p*-toluenesulfonamido)- $\beta$ -D-rhamnopyranose **13**.

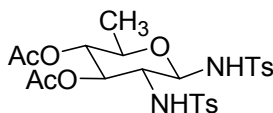

#### **13**

2.45 g of **13** was obtained from the reaction of di-*O*-acetyl-D-rhamnol **12** (1.50 g, 7.01 mmol) with chloramine-T (4.54 g, 16.12 mmol) and iodine (0.267 g, 1.05 mmol) in  $\text{CH}_3\text{CN}$  (20 mL) in 14 h as per the general procedure. Flash chromatography of the crude reaction mixture was performed with Hexane: Ethyl acetate (4:1). Yield 63%; white solid; mp 207  $^\circ\text{C}$  (recrystallized from hot benzene);  $[\alpha]_{\text{D}}^{28} +27.2$  ( $c$  1.80 in  $\text{CHCl}_3$ ); Anal. Calcd. for  $\text{C}_{24}\text{H}_{30}\text{N}_2\text{O}_9\text{S}_2$ : Found: C, 52.06; H, 5.43; N, 4.64. requires C, 51.97; H, 5.45; N, 5.05; IR (KBr):  $\nu$  3276.9, 2929.4, 2361.7, 1746.1, 1456.3, 1337.3, 1330.0, 1244.0, 1218.8, 1160.9, 1089.8, 1045.5, 897.5, 815.8, 675.5  $\text{cm}^{-1}$ ;  $^1\text{H}$  NMR (300 MHz,  $\text{CDCl}_3$ ):  $\delta$  7.81 (2 H, d,  $J = 8.0$  Hz), 7.70 (2 H, d,  $J = 8.0$  Hz), 7.30 (4 H, m), 6.27 (1 H, d,  $J = 7.5$  Hz, NH, exchangeable with  $\text{D}_2\text{O}$ ), 5.00 (1 H, d,  $J = 7.0$  Hz, NH, exchangeable with  $\text{D}_2\text{O}$ ), 4.83 (1 H, dd,  $J = 10.0, 9.5$  Hz), 4.66 (1 H, t,  $J = 9.4$  Hz), 4.59 (1 H, m), 3.48 (1 H, dq,  $J = 9.6, 6.0$  Hz), 3.35 (1 H, q,  $J = 9.3$  Hz), 2.43 (3 H, s), 2.42 (3 H, s), 1.98 (3 H, s), 1.48 (3 H, s), 1.08 (3 H, d,  $J = 6.0$  Hz);  $^{13}\text{C}$  NMR (75 MHz,  $\text{CDCl}_3$ ):  $\delta$  171.44 (s), 169.51(s), 143.98 (s), 143.55 (s), 138.15 (s), 137.41 (s), 129.91 (d), 129.41 (d), 127.30 (d), 127.18 (d), 83.61 (d), 72.99 (d), 72.88 (d), 71.34 (d), 57.01 (d), 21.51 (q), 21.45 (q), 20.56 (q), 20.05 (q), 17.15 (q).

### 1,2-Dideoxy-3,4-di-*O*-methyl-1,2-di-(*p*-toluenesulfonamido)- $\beta$ -D-rhamnopyranose

15.

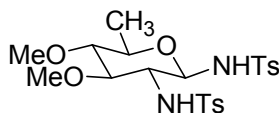

15

1.32 g of **15** was obtained from the reaction of di-*O*-methyl-D-rhamnal **14** (0.700 g, 4.43 mmol) with chloramine-T (2.87 g, 10.19 mmol) and iodine (0.168 g, 0.66 mmol) in CH<sub>3</sub>CN (10 mL) in 14 h as per the general procedure. Flash chromatography of the crude reaction mixture was performed with Hexane: Ethyl acetate (2:1). Yield 60%; white solid; mp 203 °C (recrystallized from hot benzene);  $[\alpha]_D^{28} +24.7$  (*c* 1.13 in CHCl<sub>3</sub>); Anal. Calcd. for C<sub>22</sub>H<sub>30</sub>N<sub>2</sub>O<sub>7</sub>S<sub>2</sub>: Found: C, 52.91; H, 6.02; N, 5.96. requires C, 52.99; H, 6.06; N, 5.62; IR (KBr):  $\nu$  3265.4, 2988.2, 2964.7, 2927.8, 2882.1, 2833.8, 1598.2, 1459.3, 1328.1, 1158.9, 1086.0, 1042.1, 891.8, 815.4, 678.9 cm<sup>-1</sup>; <sup>1</sup>H NMR (300 MHz, CDCl<sub>3</sub>):  $\delta$  7.81 (2 H, d, *J* = 8.3 Hz), 7.75 (2 H, d, *J* = 8.3 Hz), 7.31-7.26 (4 H, m), 6.01 (1 H, d, *J* = 7.8 Hz, NH, exchangeable with D<sub>2</sub>O), 5.14 (1 H, d, *J* = 8.3 Hz, NH, exchangeable with D<sub>2</sub>O), 4.59 (1 H, t, *J* = 8.4 Hz), 3.42 (3 H, s), 3.22 (1 H, dq, *J* = 9.3, 6.3 Hz), 3.13 (3 H, s), 3.09 (1 H, dd, *J* = 9.9, 8.7 Hz), 2.99 (1 H, dd, *J* = 9.6, 8.4 Hz), 2.64 (1 H, t, *J* = 8.8 Hz), 2.42 (3 H, s), 2.41 (3 H, s), 1.08 (3 H, d, *J* = 6.3 Hz); <sup>13</sup>C NMR (75 MHz, CDCl<sub>3</sub>):  $\delta$  143.36 (s), 138.47 (s), 137.68 (s), 129.41 (d), 129.28 (d), 127.26 (2 x d), 85.86 (d), 84.40 (d), 83.27 (d), 72.56 (d), 60.51 (q), 60.29 (q), 58.12 (q), 21.52 (q), 17.40 (q).

### 3,4,6-Tri-*O*-acetyl-1,2-dideoxy-1,2-di-(*p*-toluenesulfonamido)- $\beta$ -D-galactopyranose

17.

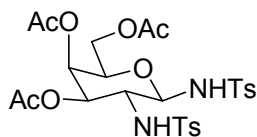

17

0.472 g of **17** was obtained from the reaction of tri-*O*-acetyl-D-galactal **16** (1.00 g, 3.68 mmol) with chloramine-T (2.38 g, 8.44 mmol) and iodine (0.140 g, 0.55 mmol) in CH<sub>3</sub>CN (10 mL) in 72 h as per the general procedure. Flash chromatography of the crude

reaction mixture was performed with Hexane: Ethyl acetate (2:1). 0.445 g (44.5%) of starting material was also recovered during the column chromatography. Isolated yield: 21% (38% based on recovered starting material); white solid; mp 112 °C (recrystallized from hot benzene);  $[\alpha]_D^{28} +27.3$  (*c* 1.50 in CHCl<sub>3</sub>); Anal. Calcd. for C<sub>26</sub>H<sub>32</sub>N<sub>2</sub>O<sub>11</sub>S<sub>2</sub>: Found: C, 50.58; H, 5.25; N, 4.67. requires C, 50.97; H, 5.26; N, 4.57; IR (KBr):  $\nu$  3430.9, 2923.8, 1749.9, 1455.3, 1371.73, 1337.2, 1237.6, 1160.9, 1082.2, 1043.8, 667.45 cm<sup>-1</sup>; <sup>1</sup>H NMR (300 MHz, CDCl<sub>3</sub>):  $\delta$  7.83 (2 H, d, *J* = 8.0 Hz), 7.73 (2 H, d, *J* = 8.0 Hz), 7.29-7.26 (4 H, m), 6.31 (1 H, d, *J* = 7.4 Hz, NH, exchangeable with D<sub>2</sub>O), 5.56 (1 H, t, *J* = 8.0 Hz, NH, exchangeable with D<sub>2</sub>O), 5.28 (1 H, brs), 4.94-4.90 (1 H, m), 4.81 (1 H, brt), 3.99-3.92 (3 H, m), 3.61 (1 H, dq, *J* = 9.6, 8.8 Hz), 2.41 (6 H, s), 2.06 (3 H, s), 1.99 (3 H, s), 1.49 (3 H, s); <sup>13</sup>C NMR (75 MHz, CDCl<sub>3</sub>):  $\delta$  170.36 (s), 169.88 (s), 143.67 (s), 138.29 (s), 137.74 (s), 129.55 (d), 129.37 (d), 127.18 (2 x d), 83.78 (d), 71.68 (d), 70.79 (d), 66.82 (d), 61.14 (t), 53.01 (d), 21.45 (q), 20.47 (2 x q), 20.02 (q); HRMS (ESI): [M+Na]<sup>+</sup> Found: 635.1349, C<sub>26</sub>H<sub>32</sub>N<sub>2</sub>O<sub>11</sub>S<sub>2</sub>Na requires 635.1345.

**4-*O*-[2,3,4,6-Tetra-*O*-acetyl-( $\beta$ -D-galactopyranosyl)]-3,6-di-*O*-acetyl-1,2-dideoxy-1,2-di-(*p*-toluenesulfonamido)- $\beta$ -D-glucopyranose **19**.**

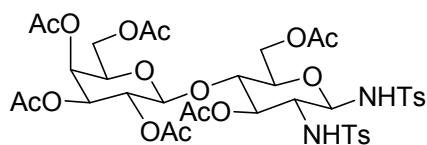

**19**

In this case 3 equiv. of chloramine-T and 20 mol% of iodine were used. 6.23 g of **19** was obtained from the reaction of hexa-*O*-acetyl lactal **18** (5.46 g, 9.75 mmol) with chloramine-T (8.24 g, 29.25 mmol) and iodine (0.495 g, 1.95 mmol) in CH<sub>3</sub>CN (50 mL) in 96 h as per the general procedure. Flash chromatography of crude the reaction mixture was performed with Hexane: Ethyl acetate (1:1). Yield 71%; white solid; mp 107 °C (recrystallized from hot benzene);  $[\alpha]_D^{28} +17.7$  (*c* 1.21 in CHCl<sub>3</sub>); IR (KBr):  $\nu$  3478.9, 3279.1, 2927.4, 1751.1, 1456.4, 1371.2, 1338.3, 1226.8, 1161.6, 1048.0, 899.3, 815.7, 668.7 cm<sup>-1</sup>; <sup>1</sup>H NMR (300 MHz, CDCl<sub>3</sub>):  $\delta$  7.80 (2 H, d, *J* = 8.1), 7.71 (2 H, t, *J* = 8.1 Hz), 7.34 (2 H, t, *J* = 7.2 Hz), 7.30 (2 H, t, *J* = 8.5 Hz), 6.36 (1 H, d, *J* = 6.9 Hz, NH, exchangeable with D<sub>2</sub>O), 5.32 (1 H, brs), 5.06-4.81 (4 H, m), 4.54 (1 H, dd, *J* = 8.4, 7.9

Hz), 4.37 (1 H, d,  $J = 7.8$  Hz), 4.33 (1 H, m), 4.11-3.92 (3 H, m), 3.82-3.80 (1 H, m), 3.65-3.56 (2 H, m), 3.35 (1 H, q,  $J = 9.4$  Hz), 2.44 (6 H, s), 2.11 (3 H, s), 2.10 (3 H, s), 2.04 (3 H, s), 2.03 (3 H, s), 1.95 (3 H, s), 1.57 (3 H, s);  $^{13}\text{C}$  NMR (75 MHz,  $\text{CDCl}_3$ ):  $\delta$  171.32 (s), 170.03 (2 x s), 169.05 (s), 144.07 (s), 143.57 (s), 137.34 (s), 129.87 (d), 129.44 (d), 127.24 (2 x d), 100.75 (d), 83.74 (d), 75.66 (d), 73.94 (d), 72.92 (d), 70.81 (d), 70.63 (d), 69.00 (d), 66.55 (d), 61.74 (t), 60.74 (t), 60.71 (t), 56.85 (d), 21.48 (q), 20.53 (q), 20.23 (q).

**4-*O*-[2,3,4,6-Tetra-*O*-acetyl-( $\alpha$ -D-glucopyranosyl)]-3,6-di-*O*-acetyl-1,2-dideoxy-1,2-di-(*p*-toluenesulfonamido)- $\beta$ -D-glucopyranose **21**.**

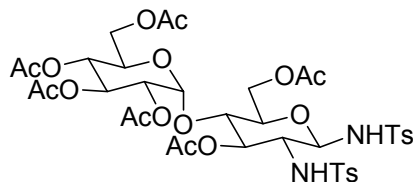

**21**

In this case 3 equiv. of chloramine-T and 20 mol% of iodine were used. 1.00 g of **21** was obtained from the reaction of hexa-*O*-acetyl-D-maltal **20** (1.00 g, 1.79 mmol) with chloramine-T (1.50 g, 5.34 mmol) and iodine (0.090 g, 0.36 mmol) in  $\text{CH}_3\text{CN}$  (6 mL) in 96 h as per the general. Flash chromatography of the crude reaction mixture was performed with Hexane: Ethyl acetate (1:1). Yield 65%; white solid; mp 168 °C (recrystallized from hot benzene);  $[\alpha]_{\text{D}}^{28} +68.1$  ( $c$  0.52 in  $\text{CHCl}_3$ ); IR (KBr):  $\nu$  3297.1, 2925.8, 1749.5, 1456.8, 1372.1, 1332.9, 1234.4, 1162.7, 1088.1, 1046.5, 896.5, 675.2  $\text{cm}^{-1}$ ;  $^1\text{H}$  NMR (300 MHz,  $\text{CDCl}_3$ ):  $\delta$  7.80 (2 H, d,  $J = 7.8$ ), 7.72 (2 H, t,  $J = 7.8$  Hz), 7.30 (4 H, m), 6.19 (1 H, d,  $J = 7.5$  Hz, NH, exchangeable with  $\text{D}_2\text{O}$ ), 5.30-5.25 (2 H, m), 5.05-4.94 (3 H, m), 4.82 (1 H, dd,  $J = 10.2, 3.6$  Hz), 4.63 (1 H, t,  $J = 8.5$  Hz), 4.26-4.00 (4 H, m), 3.89-3.81 (2 H, m), 3.60 (1H, d,  $J = 9.6$  Hz), 3.38 (1 H, q,  $J = 9.0$  Hz), 2.43 (6 H, s), 2.10 (3 H, s), 2.08 (3 H, s), 2.01 (3 H, s), 1.97 (6 H, s), 1.59 (3 H, s);  $^{13}\text{C}$  NMR (75 MHz,  $\text{CDCl}_3$ ):  $\delta$  171.46 (s), 170.44 (s), 170.33 (s), 170.16 (s), 169.77 (s), 169.32 (s), 143.94 (s) 143.50 (s), 138.12 (s), 137.41 (s), 129.83 (d) 129.32 (d), 127.11 (2 x d), 95.28 (d), 83.35 (d), 75.07 (d), 73.30 (d), 72.66 (d), 69.76 (d), 69.20 (d), 68.34 (d), 67.78 (d), 62.45 (t),

61.30 (t), 56.97 (d), 21.37 (q), 20.59 (q), 20.51 (q), 20.40 (q), 20.34 (q); HRMS (ESI):  $MH^+$  Found: 901.2374,  $C_{38}H_{49}N_2O_{19}S_2$  requires 901.2371.

### 1,2-Di-(*p*-toluenesulfonamido)-tetrahydropyran **23**.

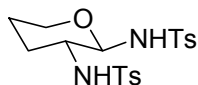

**23**

3.08 g of **23** was obtained from the reaction dihydropyran **22** (1.00 g, 11.90 mmol), using chloramine-T (7.71 g, 27.37 mmol) and iodine (0.452 g, 1.78 mmol) in  $CH_3CN$  (30 mL) in 14 h as per general procedure. Flash chromatography of the crude reaction mixture was performed with Hexane: Ethyl acetate (3:1). Yield 61%; white solid; mp 120 °C (4:1 diastereomeric mixture) (recrystallized from hot benzene); IR (KBr):  $\nu$  3391.1, 3288.9, 2957.0, 2874.6, 1597.8, 1495.9, 1428.3, 1328.5, 1162.7, 1089.6, 1050.3, 1009.3, 955.5, 894.0, 812.5, 710.4, 659.9  $cm^{-1}$ ;  $^1H$  NMR (300 MHz,  $CDCl_3$ , for major diastereomer):  $\delta$  7.79-7.74 (4 H, m), 7.33-7.27 (4 H, m), 5.72 (1 H, d,  $J = 8.2$  Hz,  $NH$  exchangeable with  $D_2O$ ), 4.83 (1 H, d,  $J = 7.3$  Hz,  $NH$  exchangeable with  $D_2O$ ), 4.40 (1 H, t,  $J = 8.4$  Hz), 3.77-3.73 (1 H, m), 3.43-3.30 (1 H, m), 2.95-2.90 (1 H, m), 2.43 (3 H, s), 2.41 (3 H, s), 1.93-1.90 (1 H, m), 1.52-1.39 (3 H, m);  $^{13}C$  NMR (75 MHz,  $CDCl_3$ , for major diastereomer):  $\delta$  143.65 (s), 143.31 (s), 138.23 (s), 137.26 (s), 129.78 (d), 129.37 (d), 126.99 (2 x d), 84.98 (d), 66.96 (t), 52.86 (d), 29.94 (t), 24.36, (t), 21.44 (2 x q); HRMS (ESI):  $[M+Na]^+$  Found: 447.1024,  $C_{19}H_{24}N_2O_5S_2Na$  requires 447.1024.

### General procedure for chemoselective acetylation of disulfonamides at *C2*-nitrogen of **7** and **19**:

To an ice cooled solution of a disulfonamide (1 equiv.) in pyridine were added acetic anhydride (2 equiv.) and DMAP (1 equiv.) and the reaction mixture was allowed to come to room temperature and stirred for 24 h. The colour of the reaction mixture changed from colourless to dark brown. It was then quenched with 10% HCl solution and extracted with ethyl acetate and washed with water. The organic layer was dried over sodium sulfate and concentrated. Product was purified by flash chromatography.



**2-*N*-Acetyl-3,4,6-tri-*O*-acetyl-1,2-dideoxy-1,2-di-(*p*-toluenesulfonamido)-β-D-glucopyranose **24**.**

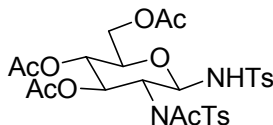

**24**

4.20 g of **24** was obtained by the acetylation of **7** (4.68 g, 7.64 mmol) using Ac<sub>2</sub>O (1.44 mL, 15.28 mmol) and DMAP (0.932 g, 7.64 mmol) and in pyridine (8 mL) as per the general procedure. Flash chromatography of the crude reaction mixture was performed with Hexane: Ethyl acetate (2:1). Yield: 84%; white crystalline solid; mp 121 °C (recrystallized from benzene/hexane);  $[\alpha]_D^{28}$  -23.2 (*c* 1.20 in CHCl<sub>3</sub>); Anal. Calcd. for C<sub>28</sub>H<sub>34</sub>N<sub>2</sub>O<sub>12</sub>S<sub>2</sub>: Found: C, 51.02; H, 5.22; N, 3.80. requires C, 51.37; H, 5.23; N, 4.28; IR (KBr):  $\nu$  3226.0, 2985.9, 2927.9, 1754.0, 1707.2, 1596.9, 1461.6, 1343.6, 1233.6, 1166.7, 1087.9, 1057.6, 928.7, 893.7, 815.4, 683.7, 663.1 cm<sup>-1</sup>; <sup>1</sup>H NMR (300 MHz, CDCl<sub>3</sub>):  $\delta$  7.93 (2 H, d, *J* = 8.2 Hz), 7.77 (2 H, d, *J* = 8.2 Hz), 7.40 (2 H, d, *J* = 8.2 Hz), 7.28 (2 H, d, *J* = 8.1 Hz), 5.80-5.71 (3 H, m), 4.99 (1 H, t, *J* = 9.5 Hz), 4.29 (1 H, t, *J* = 9.0 Hz), 4.09 (1 H, dd, *J* = 12.3, 4.3 Hz), 3.83 (1 H, dd, *J* = 12.3, 2.00 Hz), 3.73-3.68 (1 H, m), 2.45 (3 H, m), 2.42 (3 H, s), 2.07 (3 H, s), 2.04 (3 H, s), 1.98 (3 H, s), 1.79 (3 H, s); <sup>13</sup>C NMR (75 MHz, CDCl<sub>3</sub>):  $\delta$  170.62 (s), 170.46 (s), 170.01 (s), 169.41 (s), 145.69 (s), 143.66 (s), 137.81 (s), 135.76 (s), 130.23 (d), 129.38 (s), 128.29 (s), 127.33 (s), 80.95 (d), 73.09 (d), 69.69 (d), 69.03 (d), 61.74 (t), 60.87 (d), 25.69 (q), 21.55 (q), 21.46 (q), 20.60 (q), 20.49 (q), 20.37 (q).

**4-*O*-[2,3,4,6-Tetra-*O*-acetyl-(β-D-galactopyranosyl)]-2-*N*-acetyl-3,6-di-*O*-acetyl-1,2-dideoxy-1,2-di-(*p*-toluenesulfonamido)-β-D-glucopyranose **25**.**

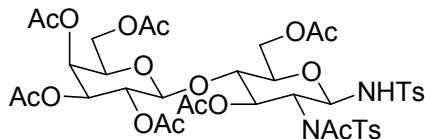

**25**

2.82 g of **25** was obtained by the acetylation of **19** (3.00 g, 3.33 mmol) using Ac<sub>2</sub>O (0.628 mL, 6.66 mmol) and DMAP (0.406 g, 3.33 mmol) in pyridine (6 mL) as per

the general procedure. Flash chromatography of the crude reaction mixture was performed with Hexane: Ethyl acetate (1:1). Yield 90%; white solid; mp 90 °C (recrystallized from benzene/hexane);  $[\alpha]_D^{28}$  -12.3 ( $c$  0.73 in  $\text{CHCl}_3$ ); IR (KBr):  $\nu$  3629.0, 3257.9, 2981.5, 1761.7, 1597.6, 1495.8, 1434.8, 1370.6, 1239.1, 1167.1, 1058.6, 924.4, 816.1, 705.6, 662.3  $\text{cm}^{-1}$ ;  $^1\text{H}$  NMR (300 MHz,  $\text{CDCl}_3$ ):  $\delta$  7.94 (2 H, d,  $J = 7.8$  Hz), 7.75 (2 H, d,  $J = 7.8$  Hz), 7.40 (2 H, d,  $J = 7.8$ ), 7.27 (2 H, d,  $J = 7.8$  Hz), 5.76-5.69 (2 H, m), 5.51 (1 H, d,  $J = 10.3$ , NH, exchangeable with  $\text{D}_2\text{O}$ ), 5.33 (1 H, s), 5.06 (1 H, dd,  $J = 9.5$ , 8.4 Hz), 4.92 (1 H, d,  $J = 10.3$  Hz), 4.44 (1 H, d,  $J = 7.5$  Hz), 4.20-3.94 (5 H, m), 3.86-3.67 (3 H, m), 2.46 (3 H, s), 2.43 (3 H, s), 2.13 (3 H, s), 2.07 (6 H, s), 2.05 (3 H, s), 2.02 (3 H, s), 1.95 (3 H, s), 1.90 (3 H, s);  $^{13}\text{C}$  NMR (75 MHz,  $\text{CDCl}_3$ ):  $\delta$  170.42 (s), 170.27 (s), 170.04 (2 x s), 169.74 (s), 168.82 (s), 145.59 (s), 143.58 (s), 137.74 (s), 135.75 (s), 130.14 (d), 129.28 (d), 128.22 (d), 127.20 (d), 100.45 (d), 80.81 (d), 76.80 (d), 73.77 (d), 70.85 (d), 70.46 (d), 69.47 (d), 68.90 (d), 66.50 (d), 61.81 (t), 60.96 (d), 60.69 (t), 25.53 (q), 21.45 (q), 21.37 (q), 20.60 (q), 20.46 (q); HRMS (ESI):  $\text{MH}^+$ , Found 943.2465.  $\text{C}_{40}\text{H}_{51}\text{N}_2\text{O}_{20}\text{S}_2$ , requires 943.2477.

**2-Acetamido-3,4,6-tri-*O*-acetyl-1,2-dideoxy-1-(*p*-toluenesulfonamido)- $\beta$ -D-glucopyranose 26.**

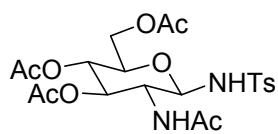

**26**

In a flame dried 100 mL three-necked round-bottomed flask, was taken powdered samarium metal (0.344 g, 2.29 mmol, 10 equiv.) and further flame dried under argon atmosphere. After cooling under argon atmosphere, dry THF (24 mL) and  $\text{CH}_2\text{I}_2$  (0.157 mL, 1.95 mmol, 8.5 equiv.) were added to it and reaction mixture was subjected to sonication at room temperature. Deep blue colour was obtained in 5 minutes. After 30 minutes, reaction flask was taken out and compound **24** (0.150 g, 0.23 mmol) was added. After stirring for 5 minutes at room temperature, degassed water (0.206 g, 11.45 mmol, 50 equiv.) was added drop-wise under argon atmosphere. The colour of reaction mixture turned grey black initially and finally to yellow brown. After 25 min, the reaction mixture

was quenched with saturated NH<sub>4</sub>Cl solution (10 mL) and extracted with CHCl<sub>3</sub> (4 x 25 mL). The combined organic layer was washed by water (2 x 25 mL) and dried over sodium sulfate and concentrated. Flash chromatography (1:1 hexane/ethyl acetate) of the resulting residue provided **26** (0.102 g) as a white solid. Yield 89%; white solid; mp 160-162 °C decompose (recrystallized from CH<sub>2</sub>Cl<sub>2</sub>/hexane); [ $\alpha$ ]<sub>D</sub><sup>28</sup> +31.0 (*c* 0.59 in THF); IR (KBr):  $\nu$  3294.1, 1746.0, 1658.4, 1543.3, 1459.4, 1377.2, 1332.6, 1238.4, 1157.5, 1086.5, 1049.4, 678.8 cm<sup>-1</sup>; <sup>1</sup>H NMR (300 MHz, CDCl<sub>3</sub>):  $\delta$  7.76 (2 H, d, *J* = 7.8), 7.27 (2H, d, *J* = 7.8), 6.54 (1 H, d, *J* = 7.8, NH, exchangeable with D<sub>2</sub>O), 6.00 (1 H, d, *J* = 7.8, NH, exchangeable with D<sub>2</sub>O), 5.02 (2 H, d, *J* = 8.8), 4.72 (1H, t, *J* = 8.7), 4.14-3.97 (3 H, m), 3.65 (1 H, brs), 2.41 (3 H, s), 2.05 (6 H, s), 2.03 (3 H, s), 1.91 (3 H, s); <sup>13</sup>C NMR (75 MHz, CDCl<sub>3</sub>):  $\delta$  172.40 (s), 171.54 (s), 170.49 (s), 169.27 (s), 143.44 (s), 138.62 (s), 129.32 (d), 126.99 (d), 84.41 (d), 73.02 (d), 72.62 (d), 68.05 (d), 61.88 (t), 53.24 (d), 22.92 (q), 21.45 (q), 20.61 (q); HRMS (ESI): [M+Na]<sup>+</sup>, Found 523.1358. C<sub>21</sub>H<sub>28</sub>N<sub>2</sub>O<sub>10</sub>SNa requires 523.1362.

#### General Procedure for 1-*N*-Alloc Protection of **24** and **25**:

In a flame dried 50 mL three-necked round bottomed flask, was taken **24** or **25** (1 equiv.) and dissolved in dry CH<sub>2</sub>Cl<sub>2</sub> under a N<sub>2</sub> atmosphere. To this, DMAP (20 mol%) and Et<sub>3</sub>N (2 equiv.) were added and the reaction mixture was cooled to ice-salt temperature. Alloc chloride (4 equiv.) was injected into the reaction mixture drop-wise. After complete addition of alloc chloride, reaction mixture was warmed to 30 °C and stirred till the reaction was over (as indicated by TLC). The reaction mixture was quenched with saturated NH<sub>4</sub>Cl solution and extracted with CHCl<sub>3</sub>. The combined organic layer was washed with water and dried over sodium sulfate and concentrated. Flash chromatography of the resulting residue provided **28** or **29** respectively as a white solid.

**2-*N*-Acetyl-3,4,6-tri-*O*-acetyl-1-*N*-allyloxycarbonyl-1,2-dideoxy-1,2-di-(*p*-toluenesulfonamido)- $\beta$ -D-glucopyranose **28**.**

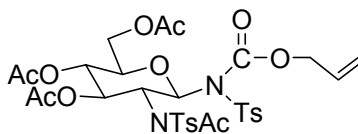

**28**

2.58 g of **28** was obtained in 9 h from **24** (2.89 g, 4.42 mmol), using DMAP (0.108 g, 0.88 mmol), Et<sub>3</sub>N (1.23 mL, 8.84 mmol) and alloc chloride (1.89 ml, 17.68 mmol) in 10 mL of dry CH<sub>2</sub>Cl<sub>2</sub> as per the general procedure. Flash chromatography of the crude reaction mixture was performed with Hexane: Ethyl acetate (3:1). Yield 79%; white solid; mp 52 °C; [α]<sub>D</sub><sup>28</sup> -33.4 (*c* 0.64 in CHCl<sub>3</sub>); IR (KBr): ν 3029.4, 2957.5, 1749.1, 1708.0, 1448.6, 1369.6, 1234.8, 1168.2, 1086.4, 1053.7, 924.2, 664.8 cm<sup>-1</sup>; <sup>1</sup>H NMR (300 MHz, CDCl<sub>3</sub>): δ 7.87 (2 H, d, *J* = 8.1 Hz), 7.76 (2 H, d, *J* = 8.1 Hz), 7.33 (2 H, d, *J* = 8.7 Hz), 7.29 (2 H, d, *J* = 8.4 Hz), 6.76 (1 H, d, *J* = 9.3 Hz), 5.99 (1 H, t, *J* = 9.6 Hz), 5.90-5.77 (1 H, m), 5.57 (1 H, t, *J* = 9.6 Hz), 5.33 (1 H, d, *J* = 17.1 Hz), 5.23 (1 H, d, *J* = 10.5 Hz), 5.11 (1 H, t, *J* = 9.6 Hz), 4.68 (1 H, dd, *J* = 13.2, 5.4 Hz), 4.52 (1 H, dd, *J* = 13.2, 5.4 Hz), 4.13 (2 H, s), 3.99-3.95 (1 H, m), 2.43 (6 H, s), 2.15 (3 H, s), 2.07 (3 H, s), 2.04 (3 H, s), 2.02 (3 H, s); <sup>13</sup>C NMR (75 MHz, CDCl<sub>3</sub>): δ 171.51 (s), 170.43 (2 x s), 169.42 (s), 150.90 (s), 145.26 (s), 144.86 (s), 136.14 (s), 135.84 (s), 130.16 (d), 129.32 (d), 128.57 (d), 127.98 (d), 119.21 (t), 82.49 (d), 73.90 (d), 70.16 (d), 69.04 (d), 68.06 (t), 62.16 (t), 58.21 (d), 26.07 (q), 21.58 (q), 21.53 (q), 20.67 (q), 20.56 (q); HRMS (ESI): MH<sup>+</sup>, found: 739.1847. C<sub>32</sub>H<sub>39</sub>N<sub>2</sub>O<sub>14</sub>S<sub>2</sub> requires 739.1843.

**4-*O*-[2,3,4,6-Tetra-*O*-acetyl-(β-D-galactopyranosyl)]-2-*N*-acetyl-1-*N*-allyloxycarbonyl-3,6-di-*O*-acetyl-1,2-dideoxy-1,2-di-(*p*-toluenesulfonamido)-β-D-glucopyranose **29**.**

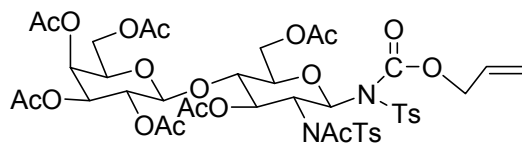

**29**

1.63 g of **29** was obtained in 12 h from **25** (2.00 g, 2.12 mmol), DMAP (0.052 g, 0.424 mmol), Et<sub>3</sub>N (0.589 mL, 4.24 mmol) and alloc chloride (0.904 g, 8.48 mmol) in dry CH<sub>2</sub>Cl<sub>2</sub> (10 mL) as per the general procedure. Flash chromatography of the crude

reaction mixture was performed with 2:1 (Hexane: Ethyl acetate). Yield 75%; white solid; mp 79 °C;  $[\alpha]_D^{28}$  -27.7 (*c* 0.49 in CHCl<sub>3</sub>); IR (KBr):  $\nu$  3481.9, 2983.2, 1747.3, 1597.2, 1432.7, 1370.2, 1228.2, 1170.4, 1062.9, 918.6, 816.0, 665.7 cm<sup>-1</sup>; <sup>1</sup>H NMR (300 MHz, CDCl<sub>3</sub>):  $\delta$  7.85 (2 H, d, *J* = 7.5 Hz), 7.77 (2 H, d, *J* = 7.5 Hz), 7.31 (4 H, m), 6.74 (1 H, d, *J* = 9.3 Hz), 5.97 (1 H, t, *J* = 9.0), 5.80-5.71 (1 H, m), 5.52 (1 H, t, *J* = 9.3 Hz), 5.36-5.10 (4 H, m), 4.97 (1 H, d, *J* = 10.2 Hz), 4.64-4.44 (4 H, m), 4.18-4.03 (4 H, m), 3.93-3.79 (2 H, m), 2.44 (6 H, s), 2.16 (3 H, s), 2.13 (3 H, s), 2.09 (9 H, s), 2.06 (3 H, s), 1.97 (3 H, s); <sup>13</sup>C NMR (75 MHz, CDCl<sub>3</sub>):  $\delta$  171.22 (s), 170.22 (s), 170.05 (s), 169.97 (s), 169.83 (s), 169.77 (s), 150.62 (s), 145.04 (s), 144.63 (s), 136.10 (s), 135.86 (s), 129.99 (d), 129.22 (d), 128.26 (d), 127.78 (d), 118.72 (t), 100.35 (d), 82.32 (d), 76.71 (d), 74.60 (d), 70.88 (d), 70.56 (d), 69.64 (d), 68.99 (d), 67.69 (t), 66.60 (d), 61.90 (t), 60.78 (t), 58.19 (d), 25.84 (q), 21.38 (q), 20.78 (d), 20.58 (q), 20.39 (q), 20.27 (q); HRMS (ESI): MH<sup>+</sup>, found: 1027.2697. C<sub>44</sub>H<sub>55</sub>N<sub>2</sub>O<sub>22</sub>S<sub>2</sub> requires 1027.2688.

**2-Acetamido-3,4,6-tri-*O*-acetyl-1-*N*-allyloxycarbonyl-1,2-dideoxy- $\beta$ -D-glucopyranose 30.**

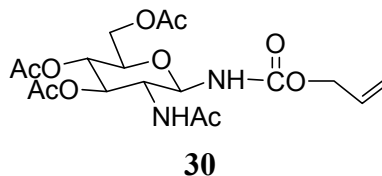

In a flame dried 100 mL three-necked round-bottomed flask, was taken powdered samarium metal (0.610 g, 4.07 mmol, 15 equiv.) and further flame dried under argon atmosphere. After cooling under argon atmosphere, dry THF (42 mL) and CH<sub>2</sub>I<sub>2</sub> (0.284 mL, 3.53 mmol, 13 equiv.) were added to it and reaction mixture was subjected to sonication at room temperature. Deep blue colour was obtained in 5 minutes. After 1 h, reaction was taken out and compound **28** (0.200 g, 0.27 mmol) was added. After stirring for 5 minutes at room temperature, degassed water (0.366 mL, 20.32 mmol, 75 equiv.) was added drop-wise under argon atmosphere and the colour of reaction mixture turned grey black initially and finally to yellow brown. After 1 h, the reaction mixture was quenched with saturated NH<sub>4</sub>Cl solution (10 mL) and extracted with CHCl<sub>3</sub> (4 x 25 mL). The combined organic layer was washed with water (2 x 25 mL) and dried over sodium

sulfate and concentrated. Flash chromatography (1:1 hexane/ethyl acetate) of the resulting residue provided **30** (0.105 g, 90%) as a white solid. Mp 164 °C (decomp.) (recrystallized from CH<sub>2</sub>Cl<sub>2</sub>/hexane);  $[\alpha]_D^{28}$  -9.3 (*c* 0.59 in CHCl<sub>3</sub>); IR (KBr)  $\nu$  3324.8, 3268.3, 2925.2, 1748.6, 1708.6, 1654.6, 1541.6, 1223.7, 1045.7, 771.8 cm<sup>-1</sup>; <sup>1</sup>H NMR (300 MHz, CDCl<sub>3</sub>):  $\delta$  6.23 (1 H, d, *J* = 8.7 Hz, *NH*, exchangeable with D<sub>2</sub>O), 5.99 (1 H, brd, *NH*, exchangeable with D<sub>2</sub>O), 5.94-5.81 (1 H, m), 5.27 (1 H, d, *J* = 17.1 Hz), 5.20 (1 H, d, *J* = 10.5 Hz), 5.16-5.02 (2 H, m), 4.86 (1 H, t, *J* = 9.3 Hz), 4.56 (2 H, d, *J* = 5.4 Hz), 4.30 (1 H, dd, *J* = 12.3, 3.9 Hz), 4.19-4.07 (2 H, m), 3.74 (1 H, brd), 2.09 (3 H, s), 2.07 (3 H, s), 2.04 (3 H, s), 1.96 (3 H, s); <sup>13</sup>C NMR (75 MHz, CDCl<sub>3</sub>):  $\delta$  171.47 (2 x s), 170.65 (s), 169.27 (s), 155.81 (s), 132.21 (d), 117.74 (t), 82.21, 73.06 (2 x d), 68.04 (d), 65.94 (t), 61.81 (t), 52.71 (d), 22.96 (q), 20.62 (q), 20.51 (s); HRMS (ESI): MH<sup>+</sup>, found: 431.1667. C<sub>18</sub>H<sub>27</sub>N<sub>2</sub>O<sub>10</sub> requires 431.1666.

**4-*O*-[2,3,4,6-Tetra-*O*-acetyl-( $\beta$ -D-galactopyranosyl)]-2-acetamido-3,6-di-*O*-acetyl-1-*N*-allyloxycarbonyl-1,2-dideoxy- $\beta$ -D-glucopyranose **31**.**

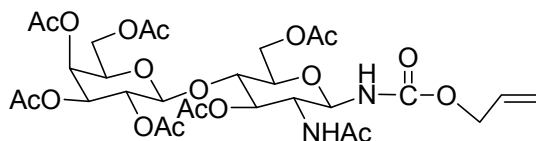

**31**

Following the similar procedure as for compound **30**, compound **31** was obtained in 88% yield (0.123 g) as a white solid from the reaction of **29** (0.200 g, 0.195 mmol) with SmI<sub>2</sub> (3.31 mmol, 17 equiv.) in dry THF (35 mL) and degassed water (0.351 mL, 19.50 mmol, 100 equiv.). Flash chromatography of the crude reaction mixture was performed with 1:2 (Hexane: Ethyl acetate). Mp 94 °C;  $[\alpha]_D^{28}$  +5.4 (*c* 0.58 in CHCl<sub>3</sub>); IR (KBr)  $\nu$  3369.4, 2926.6, 1746.5, 1539.9, 1370.2, 1226.8, 1047.6 cm<sup>-1</sup>; <sup>1</sup>H NMR (300 MHz, CDCl<sub>3</sub>):  $\delta$  6.17 (1 H, d, *J* = 7.4 Hz, *NH*, exchangeable with D<sub>2</sub>O), 6.02 (1 H, d, *J* = 7.8 Hz, *NH*, exchangeable with D<sub>2</sub>O), 5.92-5.81 (1 H, m), 5.33 (2 H, d, *J* = 17.0 Hz), 5.22 (1 H, dd, *J* = 10.4, 8.7 Hz), 5.14-4.95 (3 H, m), 4.79 (1 H, t, *J* = 8.0 Hz), 4.56-4.41 (4 H, m), 4.15-3.96 (4 H, m), 3.89-3.67 (3 H, m), 2.15 (3 H, s), 2.12 (3 H, s), 2.10 (3 H, s), 2.06 (6 H, s), 1.97 (3 H, s), 1.96 (3 H, s); <sup>13</sup>C NMR (75 MHz, CDCl<sub>3</sub>):  $\delta$  171.76 (s),

171.40 (s), 170.32 (s), 170.24 (s), 169.98 (2 x s), 169.11 (s), 155.63 (s), 132.21 (d), 117.72 (t), 100.96 (d), 82.29 (d), 75.74 (d), 73.95 (d), 73.08 (d), 70.82 (d), 70.63 (t), 68.97 (d), 66.60 (d), 65.90 (t), 62.03 (t), 60.81 (t), 53.07 (d), 22.94 (q), 20.71 (q), 20.49 (s).

**$\alpha$ -*N*-*tert*-Butoxycarbonyl-(*N*-2-Acetamido-3,4,6-tri-*O*-acetyl-1,2-dideoxy- $\beta$ -D-glucopyranosyl)glycine **32**.**

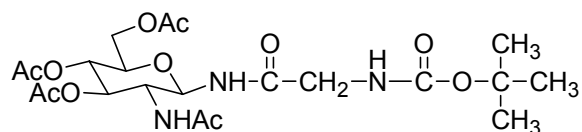

**32**

In a flame dried 50 mL three-necked round bottomed flask, was taken **30** (0.198 g, 0.46 mmol) and dissolved in dry THF (2 mL) under a N<sub>2</sub> atmosphere. To this, (Ph<sub>3</sub>P)<sub>4</sub>Pd (0.058g, 0.05 mmol, 10 mol%) was added followed by drop-wise addition of Et<sub>2</sub>NH (0.477 mL, 4.60 mmol, 10 equiv.). The reaction mixture was allowed to stir at room temperature (30 °C). After completion of reaction (20 minutes, as indicated by TLC), THF was evaporated completely. This was then dissolved in dry CH<sub>2</sub>Cl<sub>2</sub> (5 mL) and transferred drop-wise to a suspension of *N*-*tert*-Boc glycine (0.184 g, 0.69 mmol, 1.5 equiv.), DCC (0.171 g, 0.83 mmol, 1.8 equiv.) and DMAP (0.084 g, 0.69 mmol, 1.5 equiv.) in dry CH<sub>2</sub>Cl<sub>2</sub> (6 mL) that was pre-stirred for 2 h. Reaction mixture was then allowed to stir at 30 °C for 12 h., after which it was filtered and the residue was washed with more amount of CH<sub>2</sub>Cl<sub>2</sub> (100 mL). Organic layer was washed with 5% NaHCO<sub>3</sub> (2 x 20 mL), saturated NH<sub>4</sub>Cl (3 x 20 mL), dried over sodium sulfate and concentrated. Flash chromatography (ethyl acetate) of the resulting residue provided **32** (0.167 g, 72%) as a white solid. Mp 85 °C (recrystallized from ethyl acetate: hexane); [ $\alpha$ ]<sub>D</sub><sup>28</sup> +3.4 (*c* 0.24 in CHCl<sub>3</sub>); IR (KBr):  $\nu$  3319.3, 2975.7, 2358.9, 1747.5, 1665.0, 1533.1, 1376.4, 1241.1, 1168.6, 1046.9 cm<sup>-1</sup>; <sup>1</sup>H NMR (300 MHz, CDCl<sub>3</sub>):  $\delta$  7.46 (1 H, d, *J* = 7.6 Hz, NH, exchangeable with D<sub>2</sub>O), 6.26 (1 H, d, *J* = 8.3 Hz, NH, exchangeable with D<sub>2</sub>O), 5.16-5.09 (4 H, m), 4.28 (1 H, dd, *J* = 12.3, 4.2 Hz), 4.21-4.13 (1H, m), 4.08 (1 H, dd, *J* = 12.3, 1.8 Hz), 3.81-3.80 (3 H, m), 2.09 (3 H, s), 2.06 (3 H, s), 2.04 (3 H, s), 1.94 (3 H, s),

1.46 (9 H, s);  $^{13}\text{C}$  NMR (75 MHz,  $\text{CDCl}_3$ ):  $\delta$  172.00 (s), 171.58 (s), 170.70 (s), 170.65 (s), 169.28 (s), 155.73 (s), 79.96 (d), 73.51 (d), 72.84 (d), 67.90 (s), 61.78 (t), 53.14 (d), 44.11 (t), 28.27 (3 x q), 22.94 (3 x q), 20.68 (q), 20.63 (q), 20.54 (q); HRMS (ESI):  $\text{MH}^+$ , Found 504.2204.  $\text{C}_{21}\text{H}_{34}\text{N}_3\text{O}_{11}$  requires 504.2193.



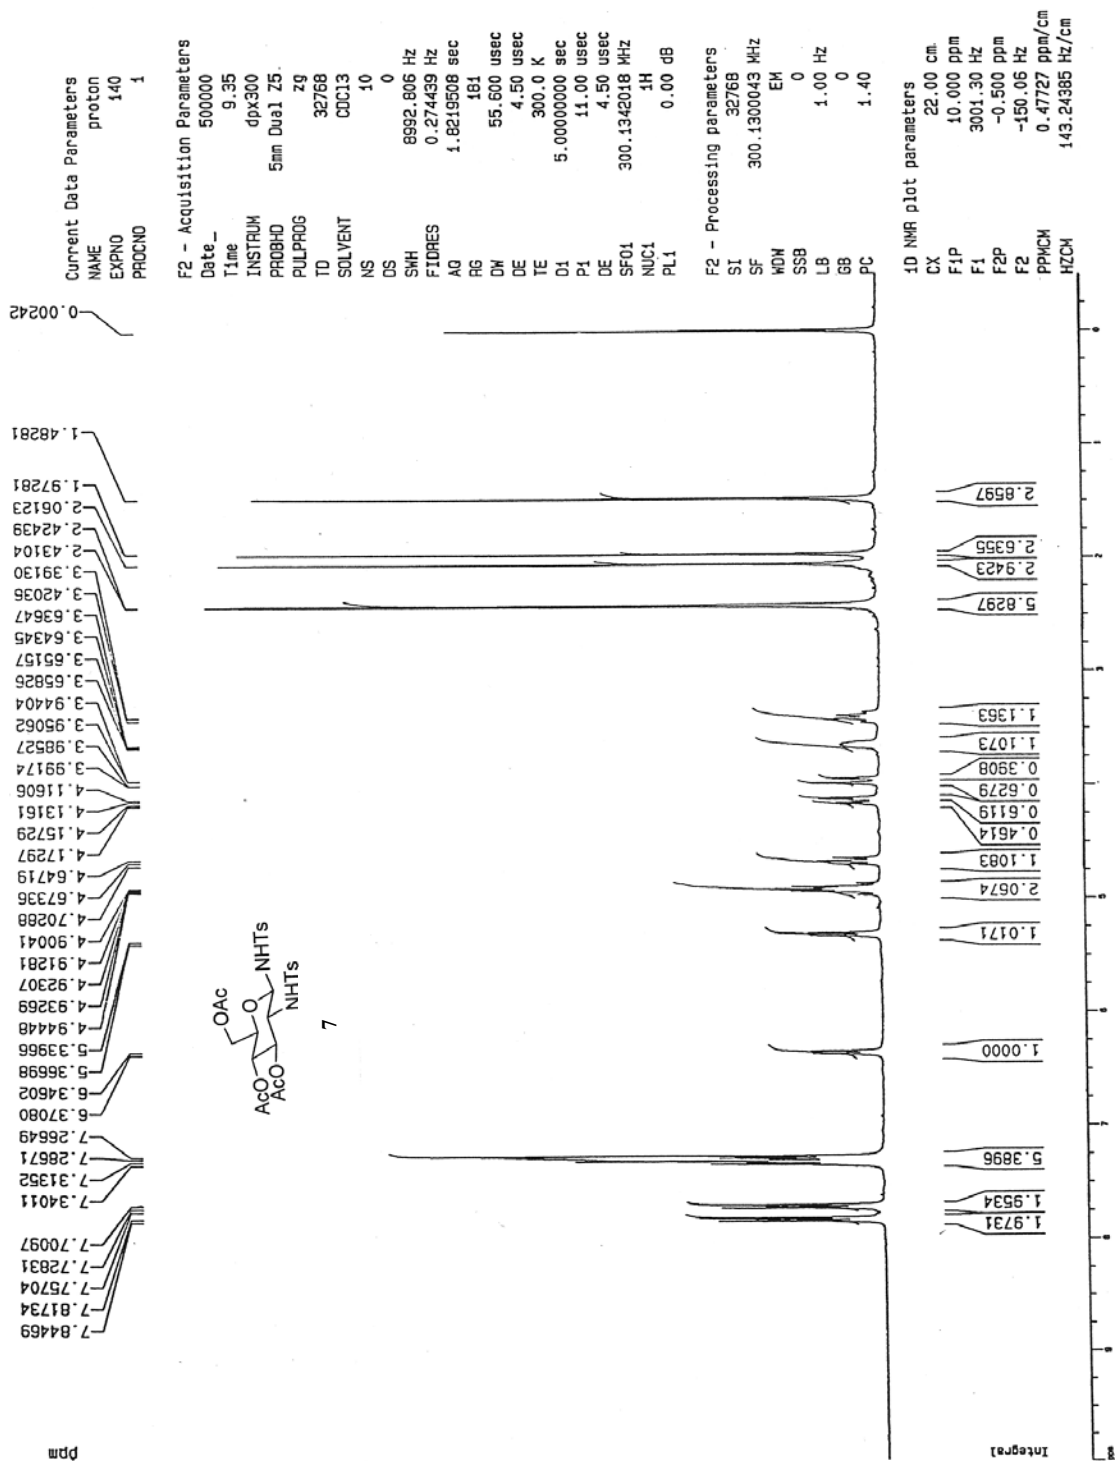



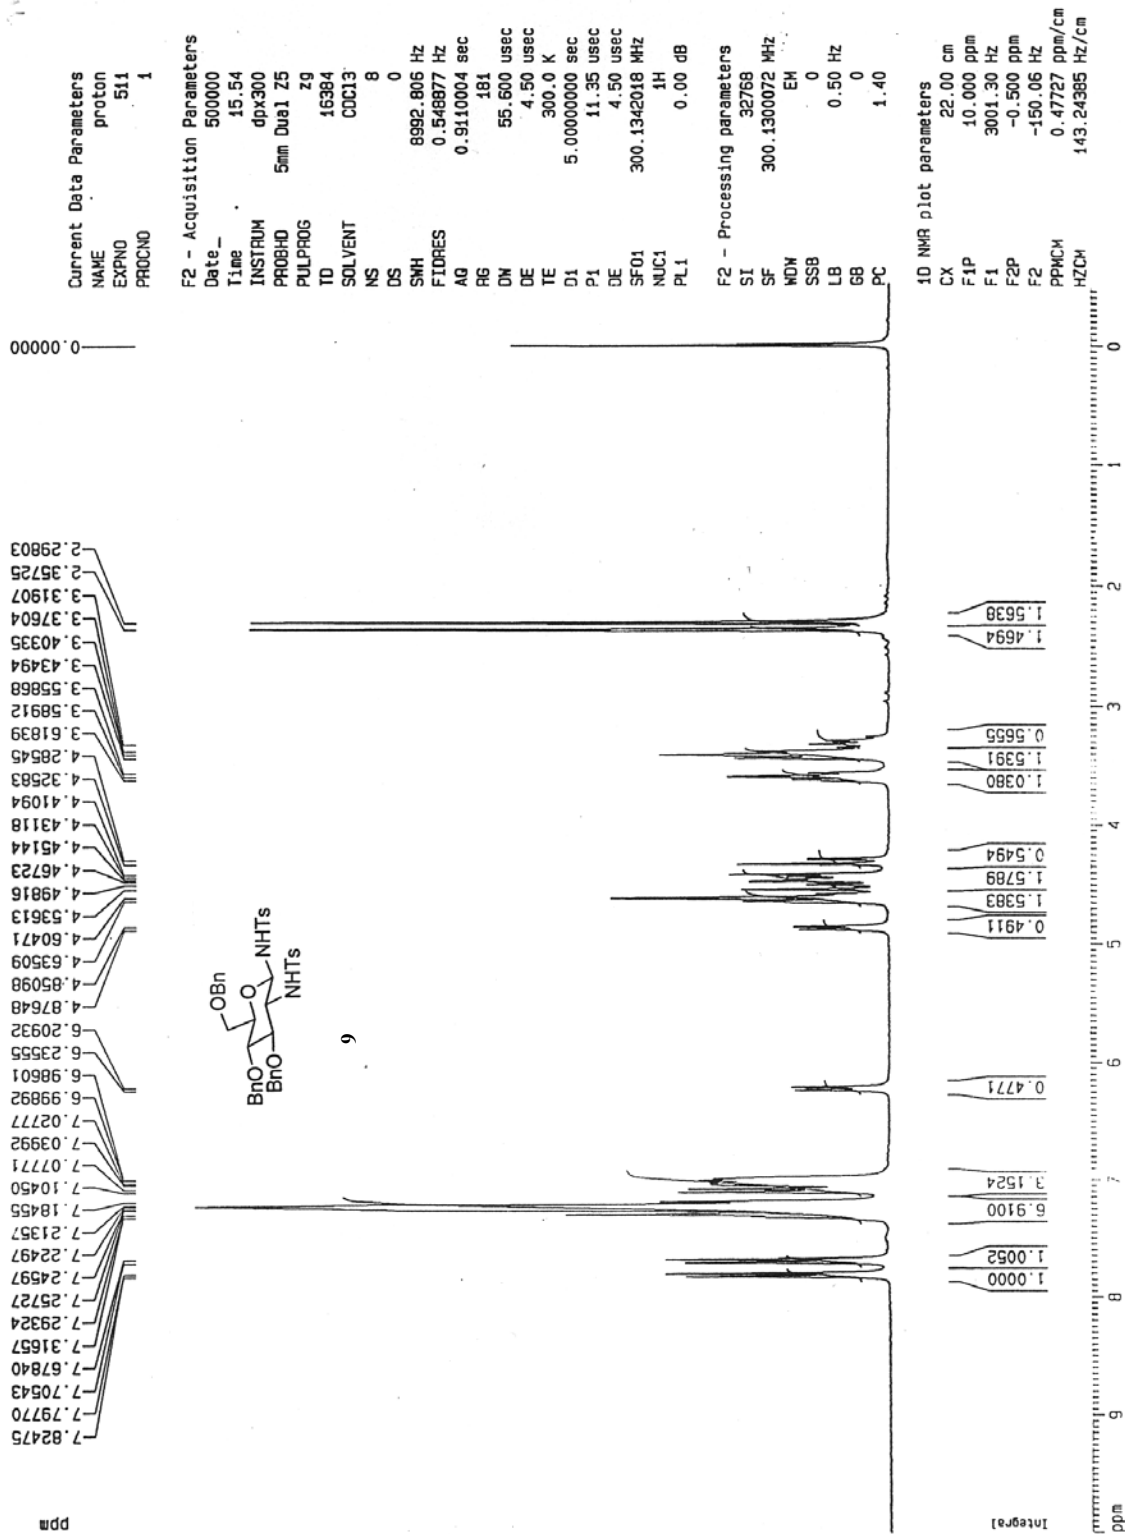

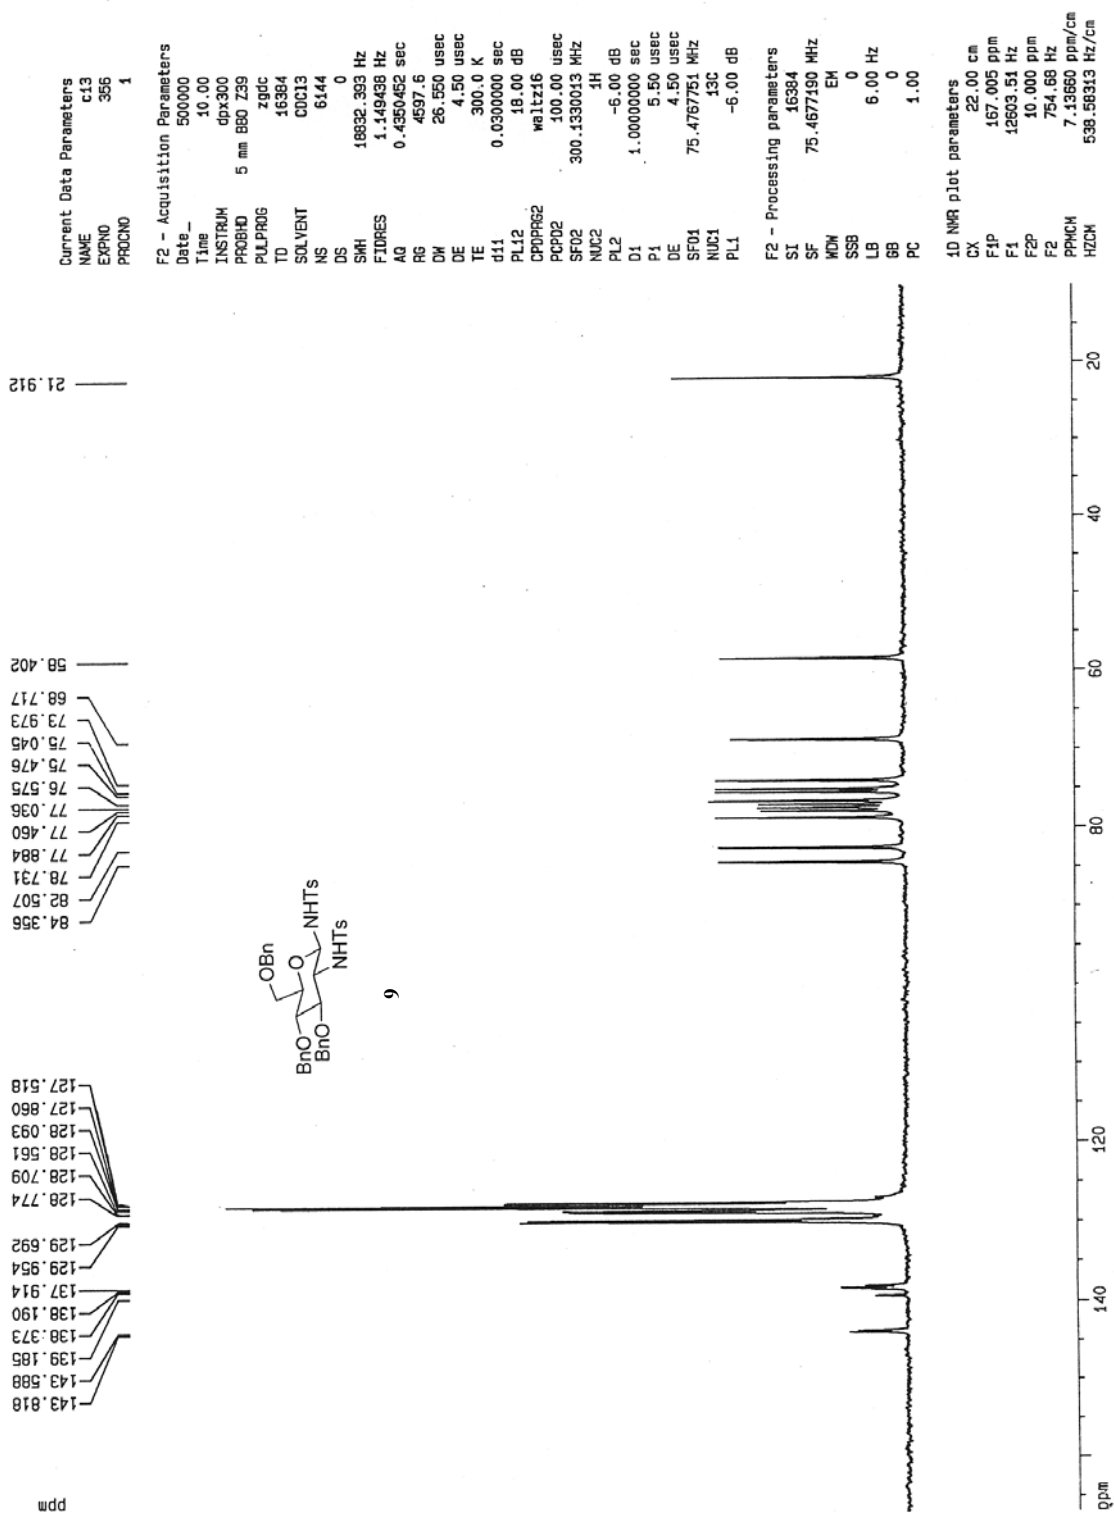

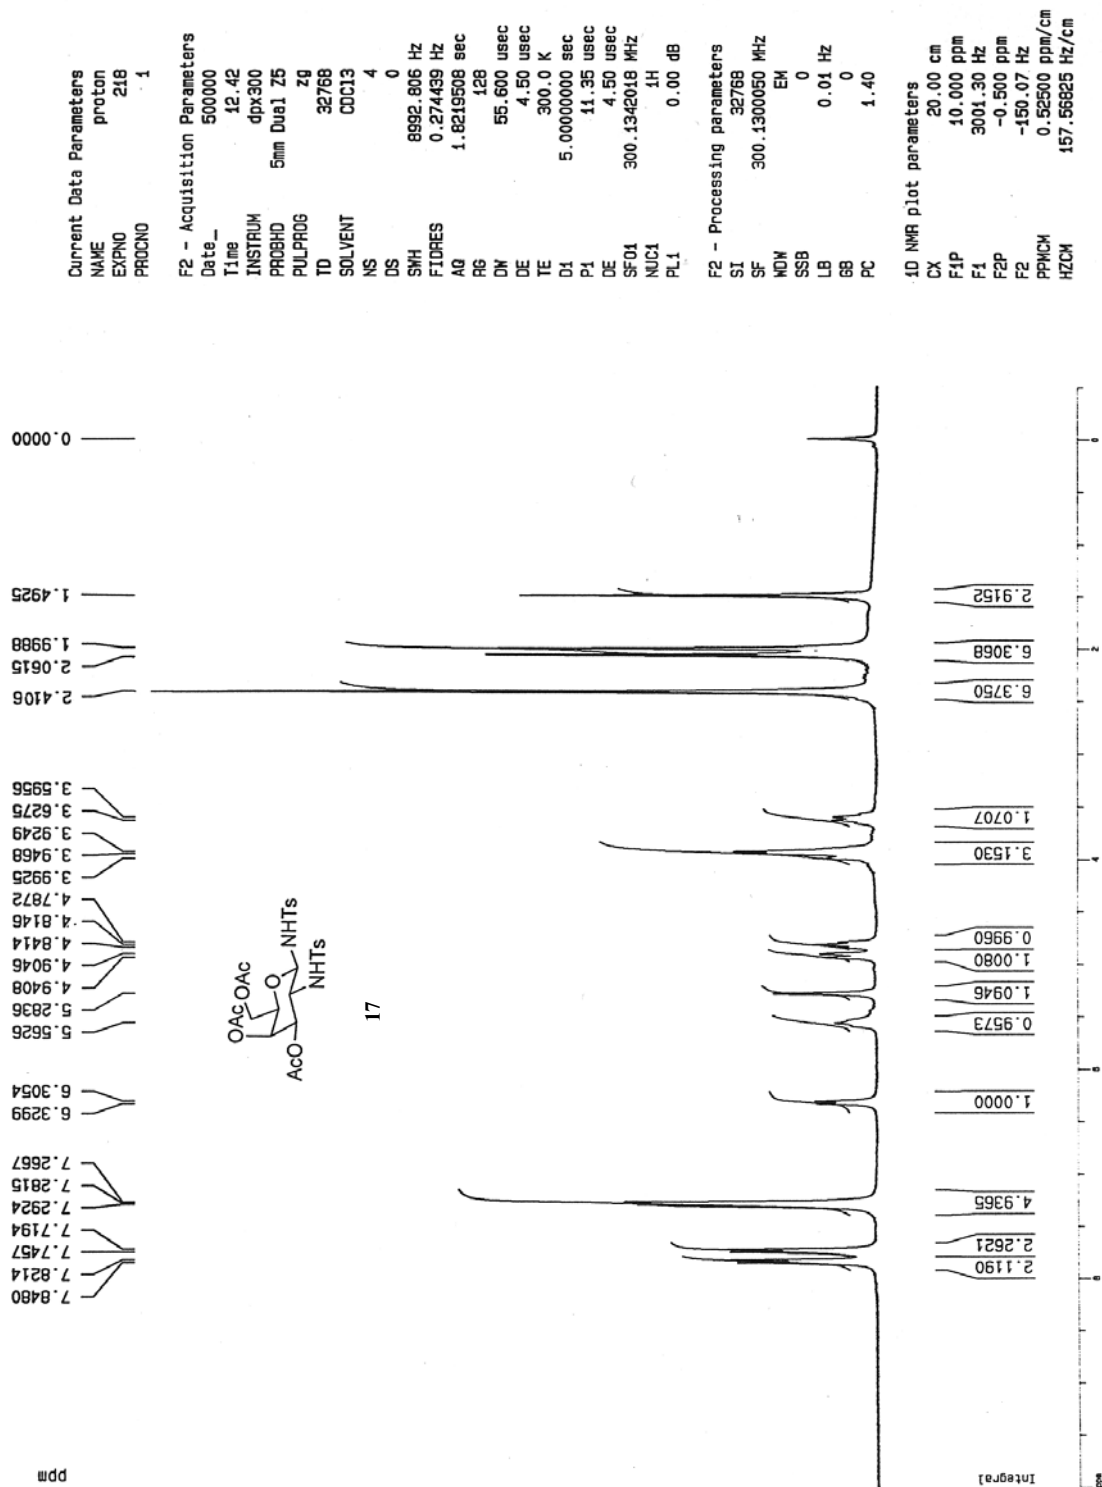

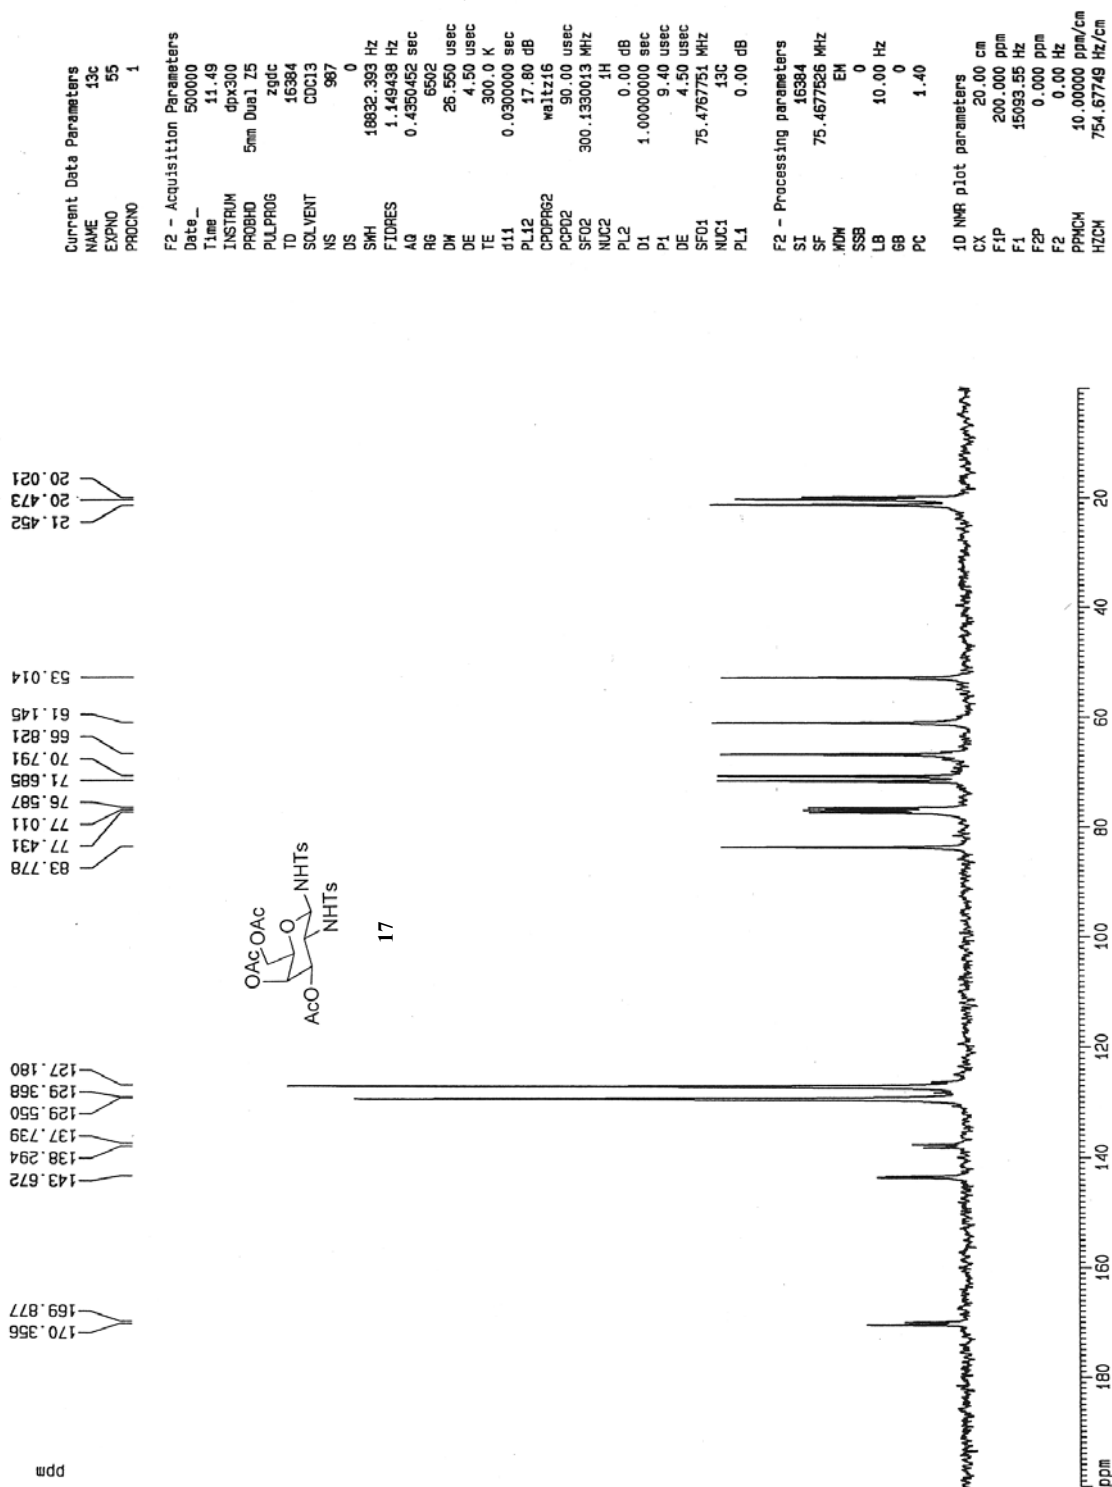

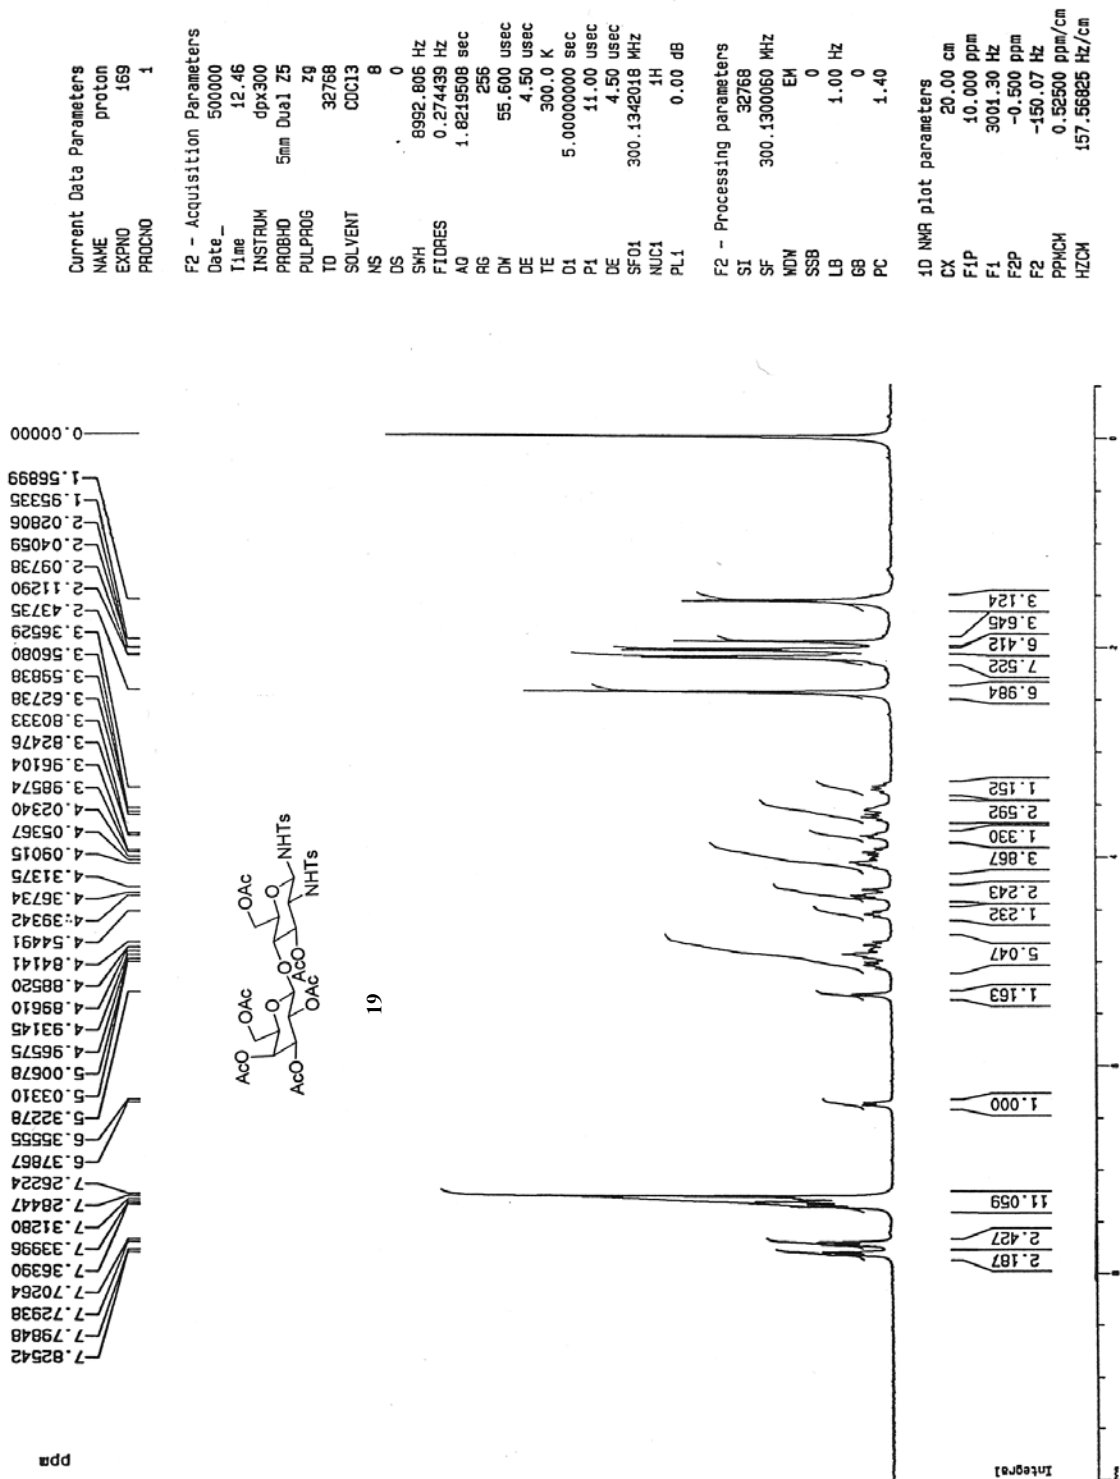

Current Data Parameters  
 NAME 13c  
 EXPNO 18  
 PROCNO 1

F2 - Acquisition Parameters  
 Date\_ 500000  
 Time\_ 14.01  
 INSTRUM dpx300  
 PROBHD 5mm Dui1 Z5  
 PULPROG zgpgc  
 TD 16384  
 SOLVENT CDC13  
 NS 7048  
 DS 0  
 SMH 18832.393 Hz  
 FIDRES 1.149438 Hz  
 AQ 0.4350452 sec  
 RG 5792.6  
 DM 26.550 usec  
 DE 4.50 usec  
 TE 300.0 K  
 d11 0.0300000 sec  
 PL12 17.80 dB  
 CPOPRG2 meltz16  
 PCPD2 90.00 usec  
 SF02 300.1330013 MHz  
 NUC2 1H  
 PL2 0.00 dB  
 D1 1.0000000 sec  
 P1 9.40 usec  
 DE 4.50 usec  
 SF01 75.476751 MHz  
 NUC1 13C  
 PL1 0.00 dB

F2 - Processing parameters  
 SI 16384  
 SF 75.4677514 MHz  
 KM EN  
 SSB 0  
 LB 10.00 Hz  
 GB 0  
 PC 1.40

1D NMR plot parameters  
 CX 20.00 cm  
 F1P 200.000 ppm  
 F1 15093.55 Hz  
 F2P 0.000 ppm  
 F2 0.00 Hz  
 PPMCH 10.00000 ppm/cm  
 HZCH 754.67749 Hz/cm

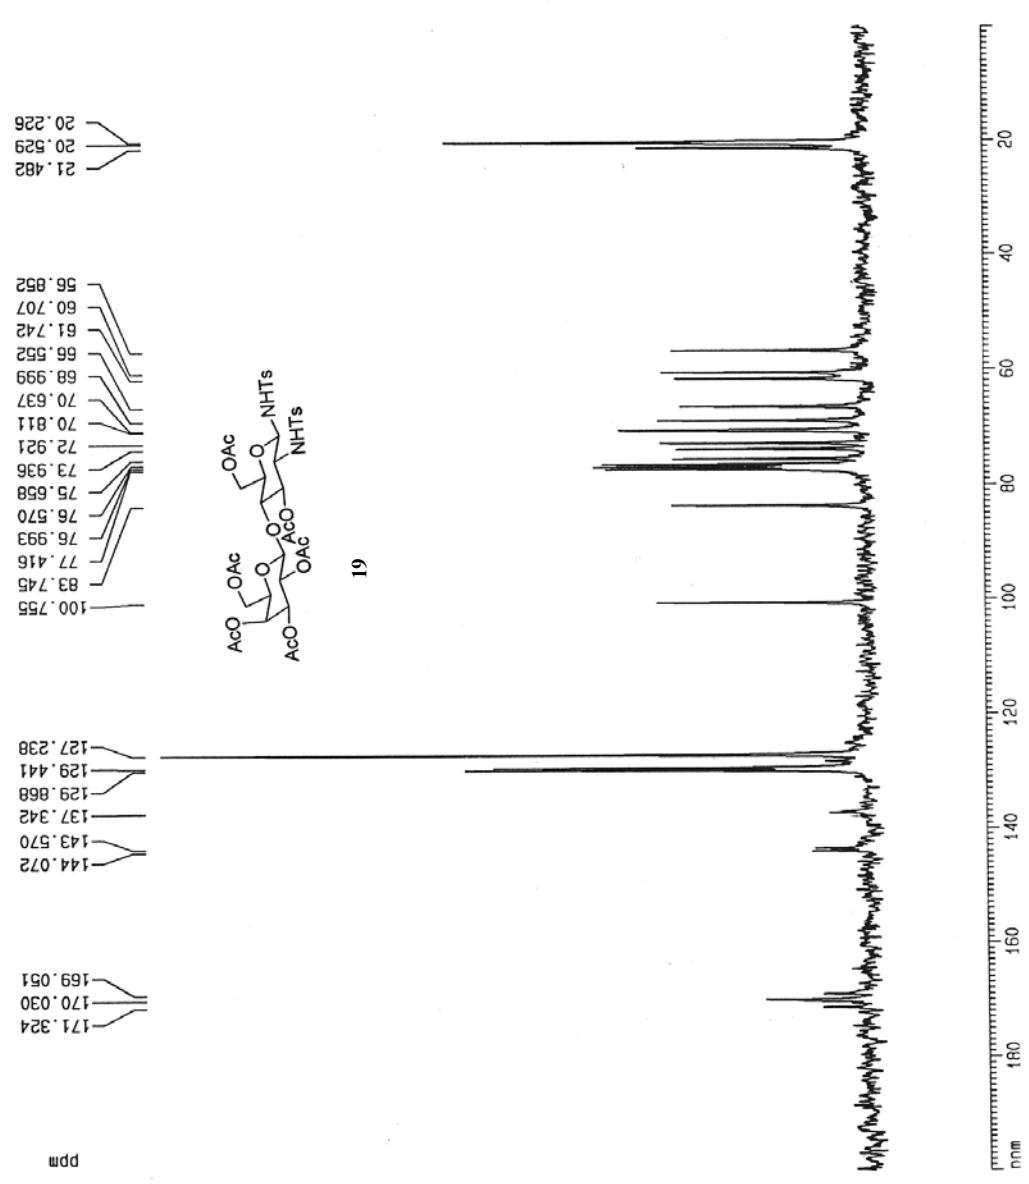



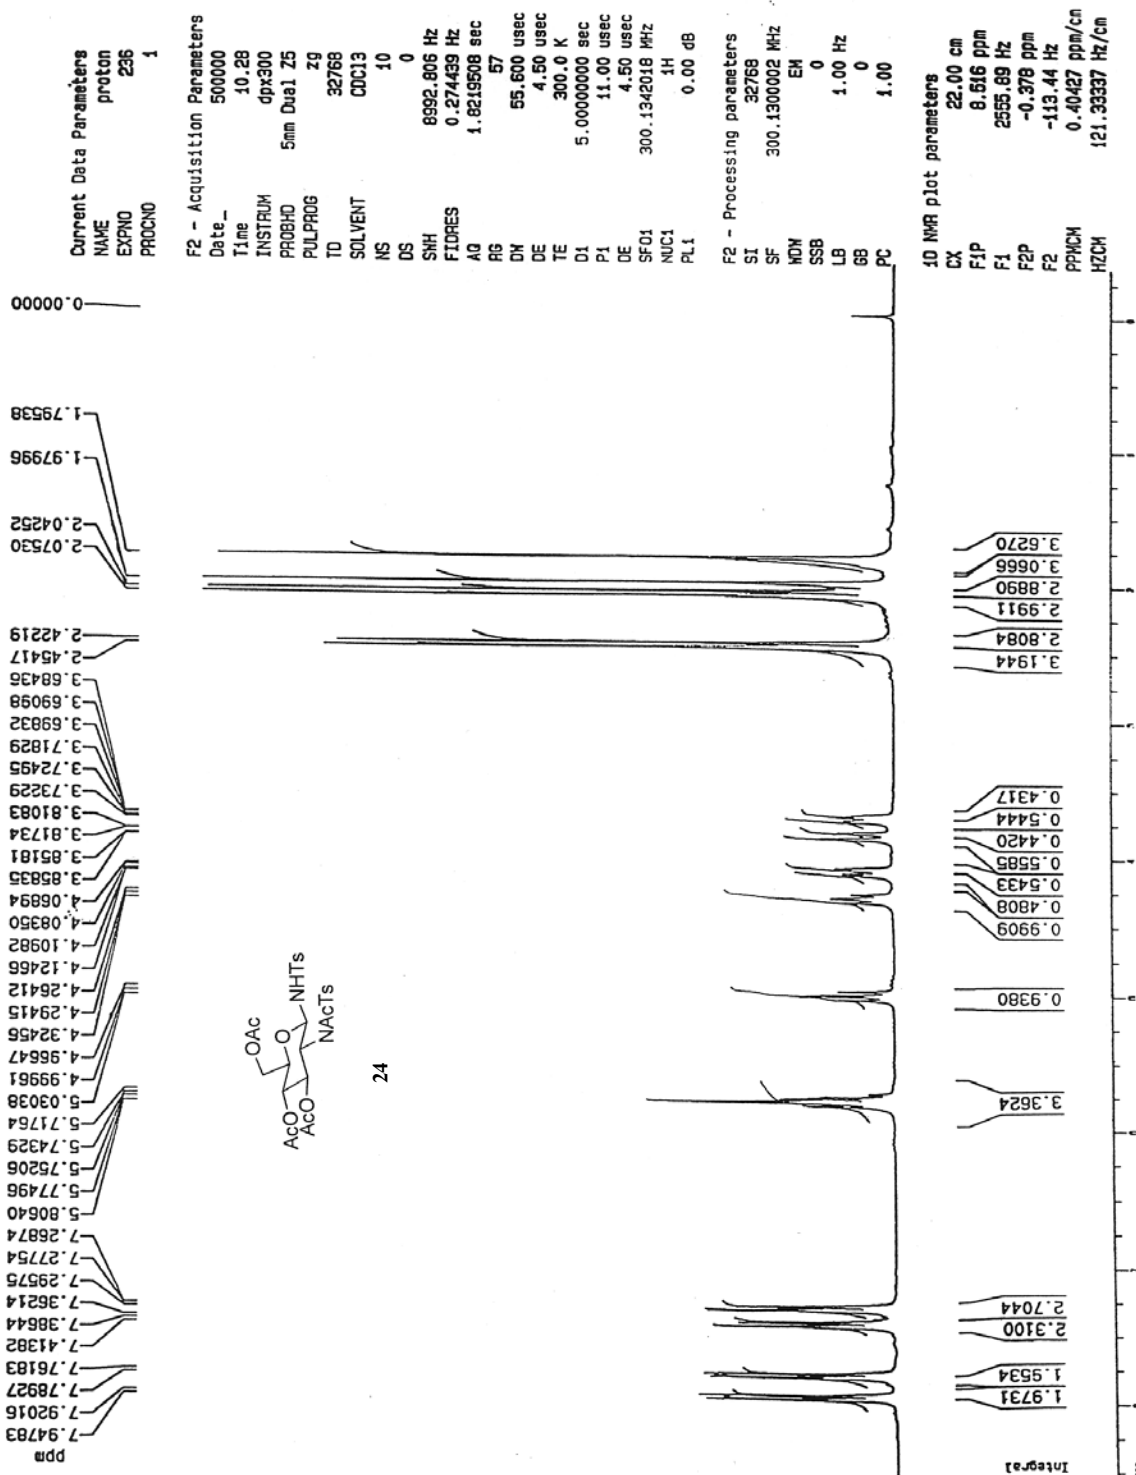

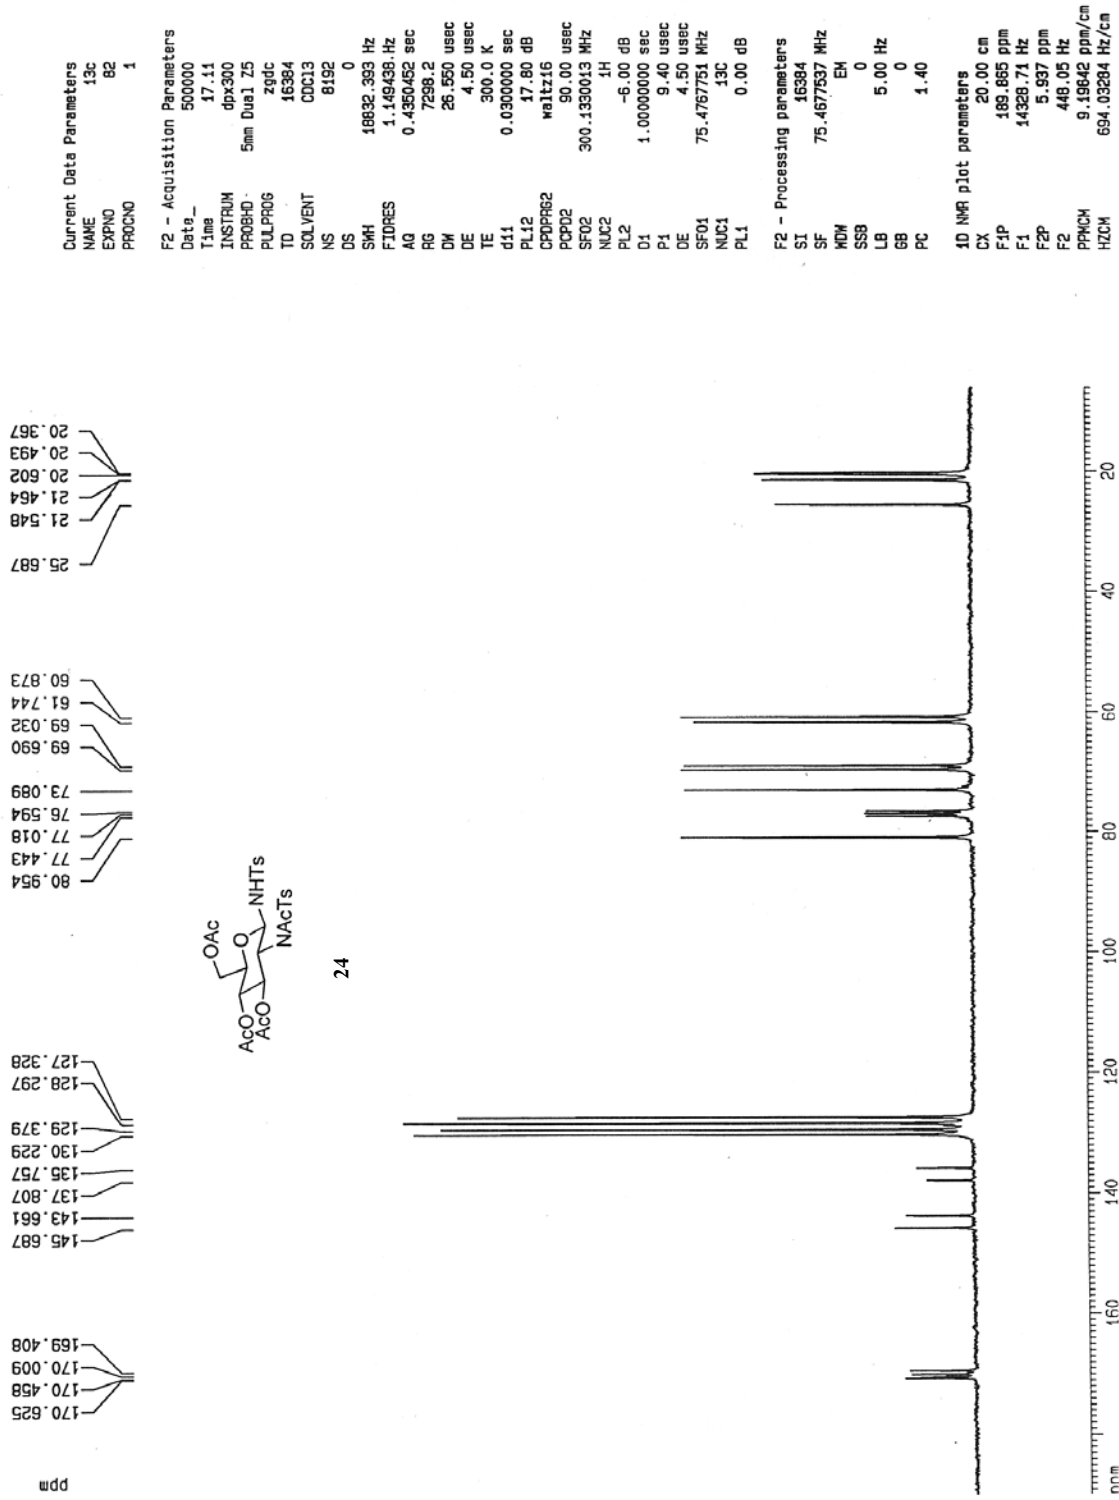

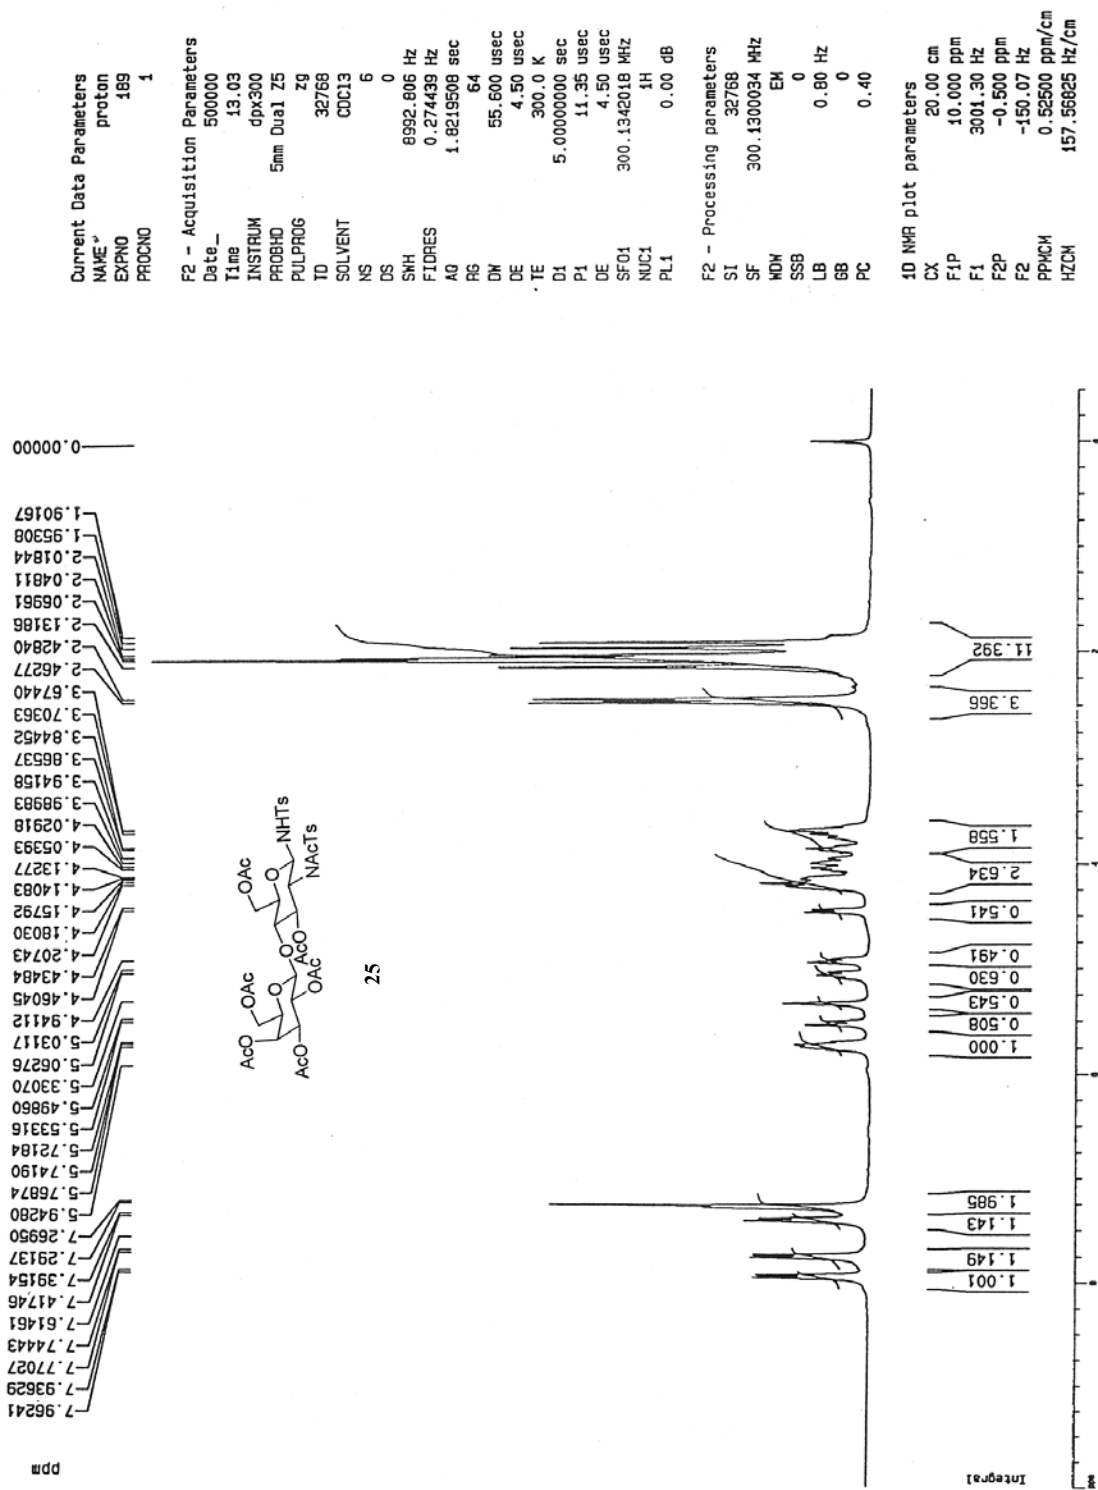

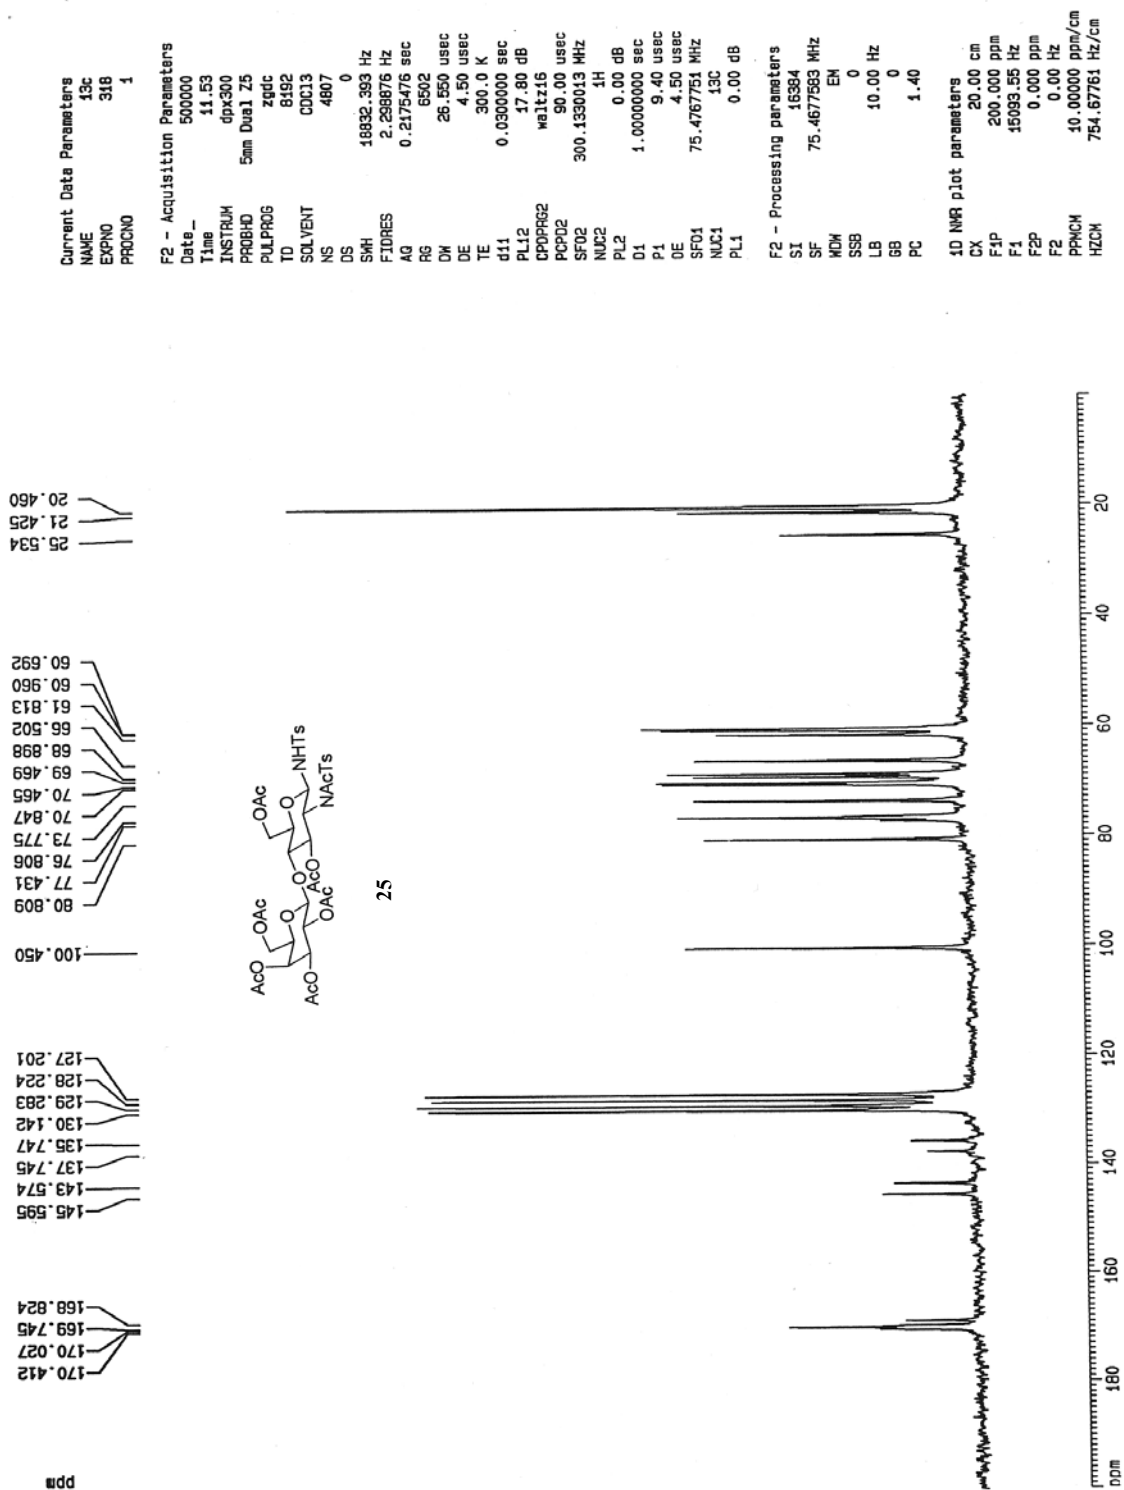

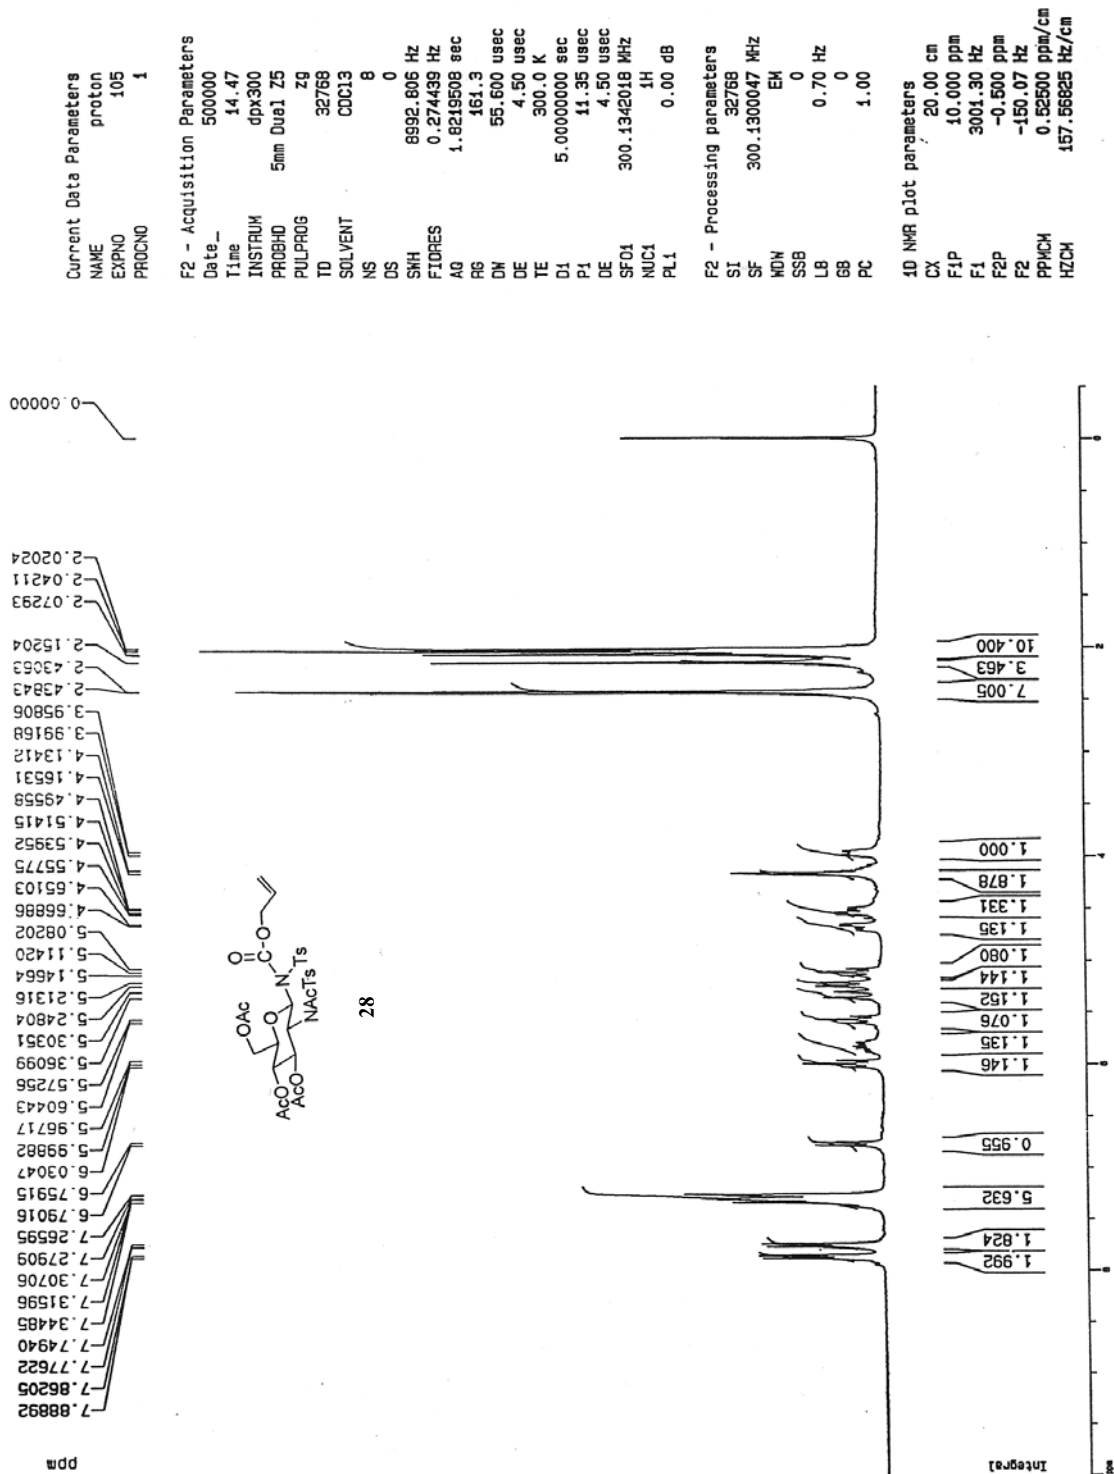

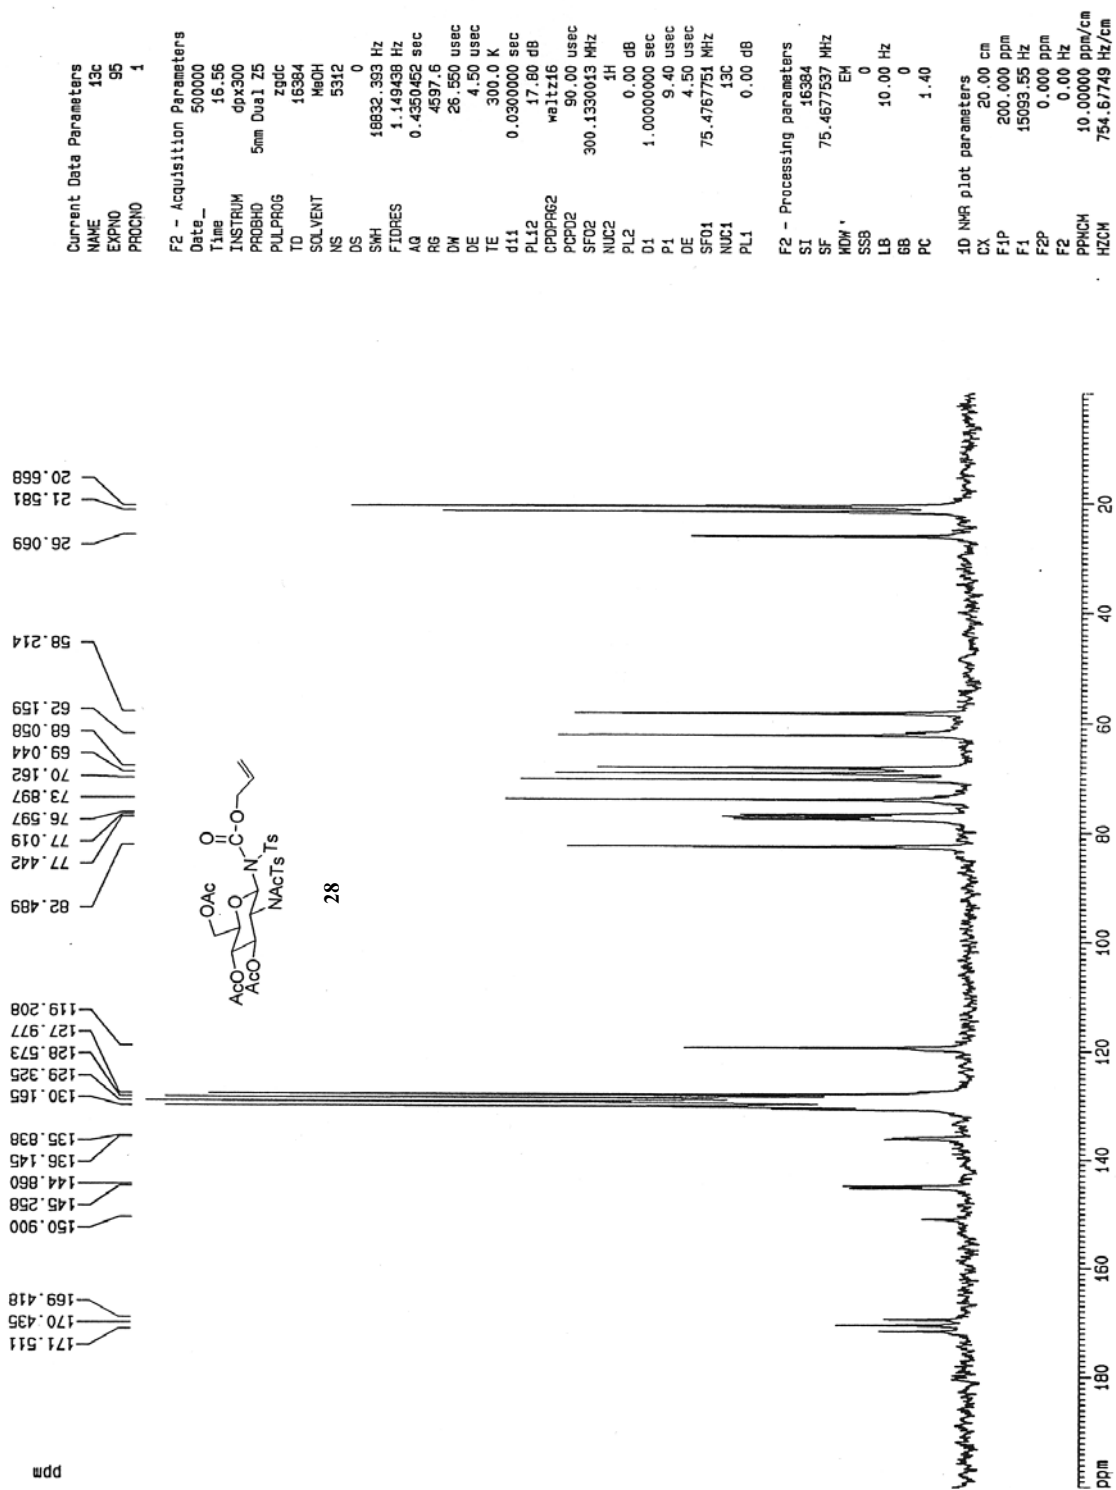

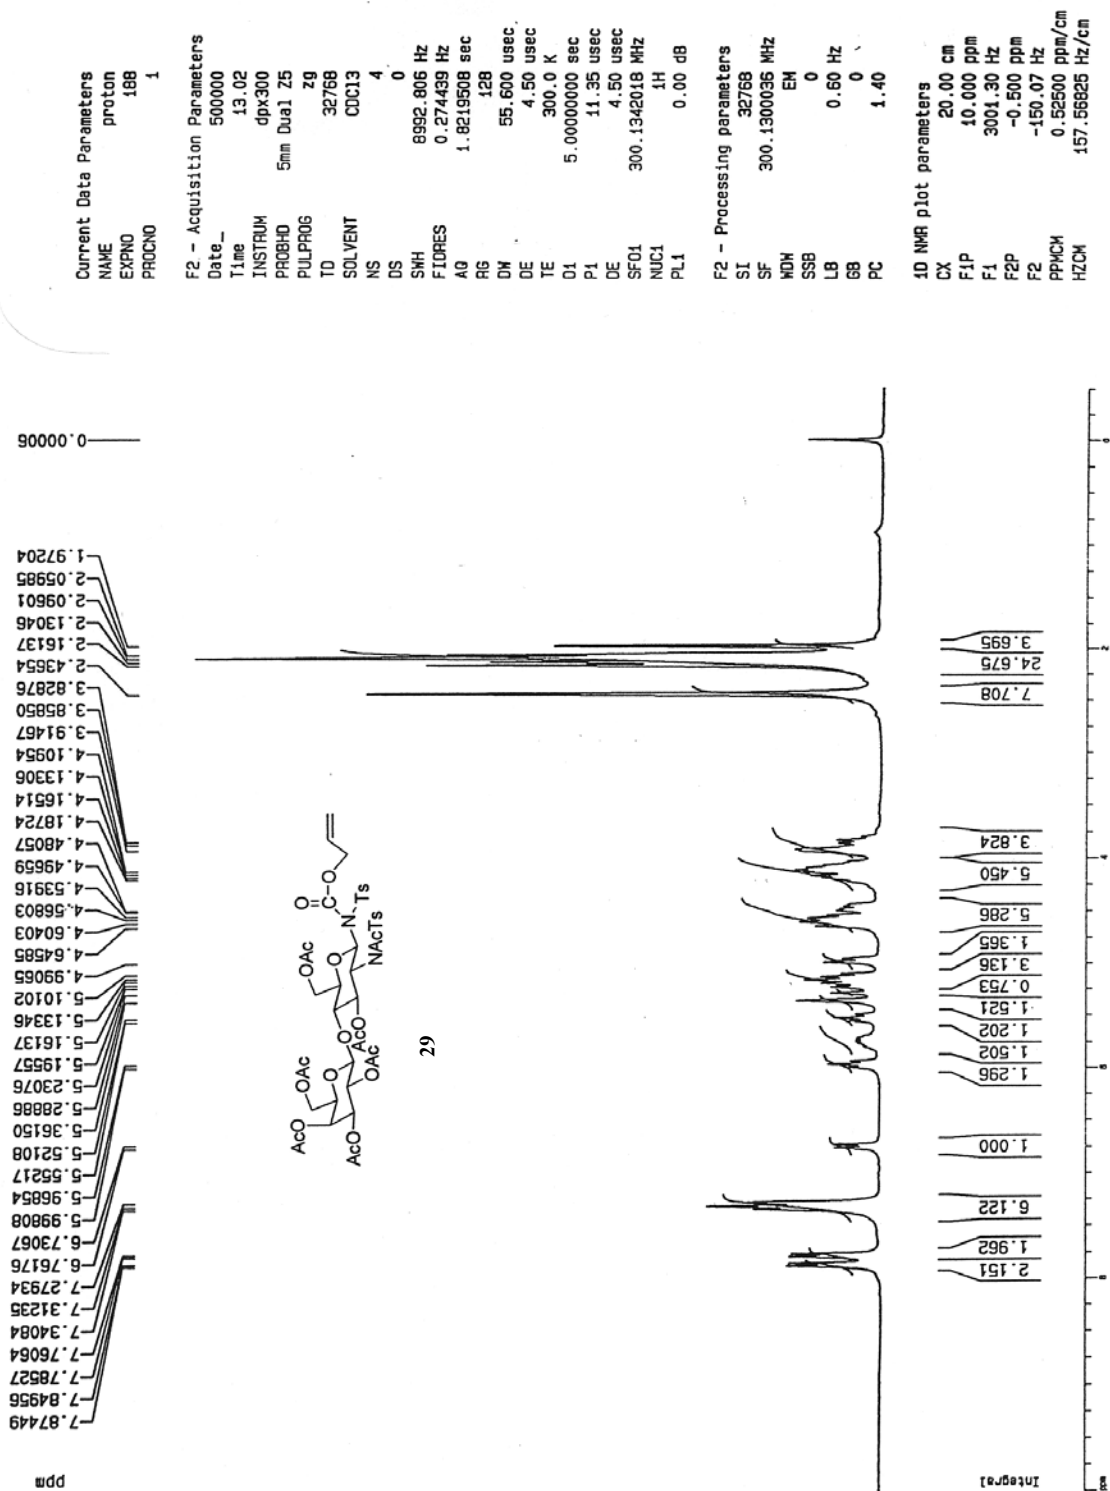

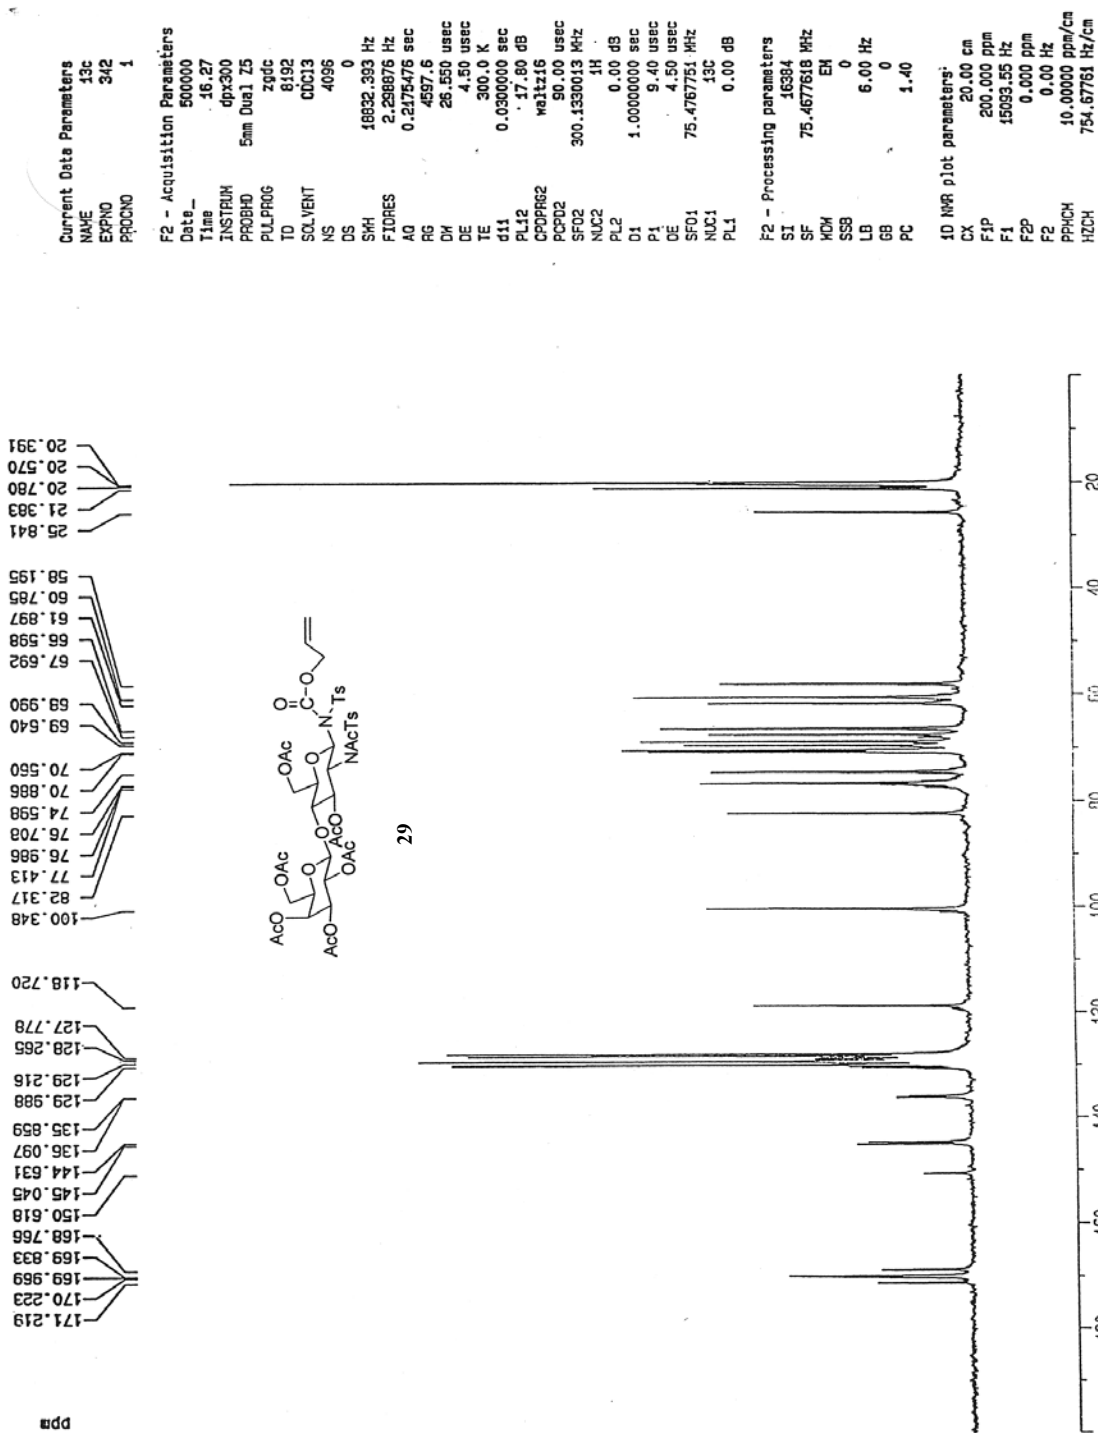



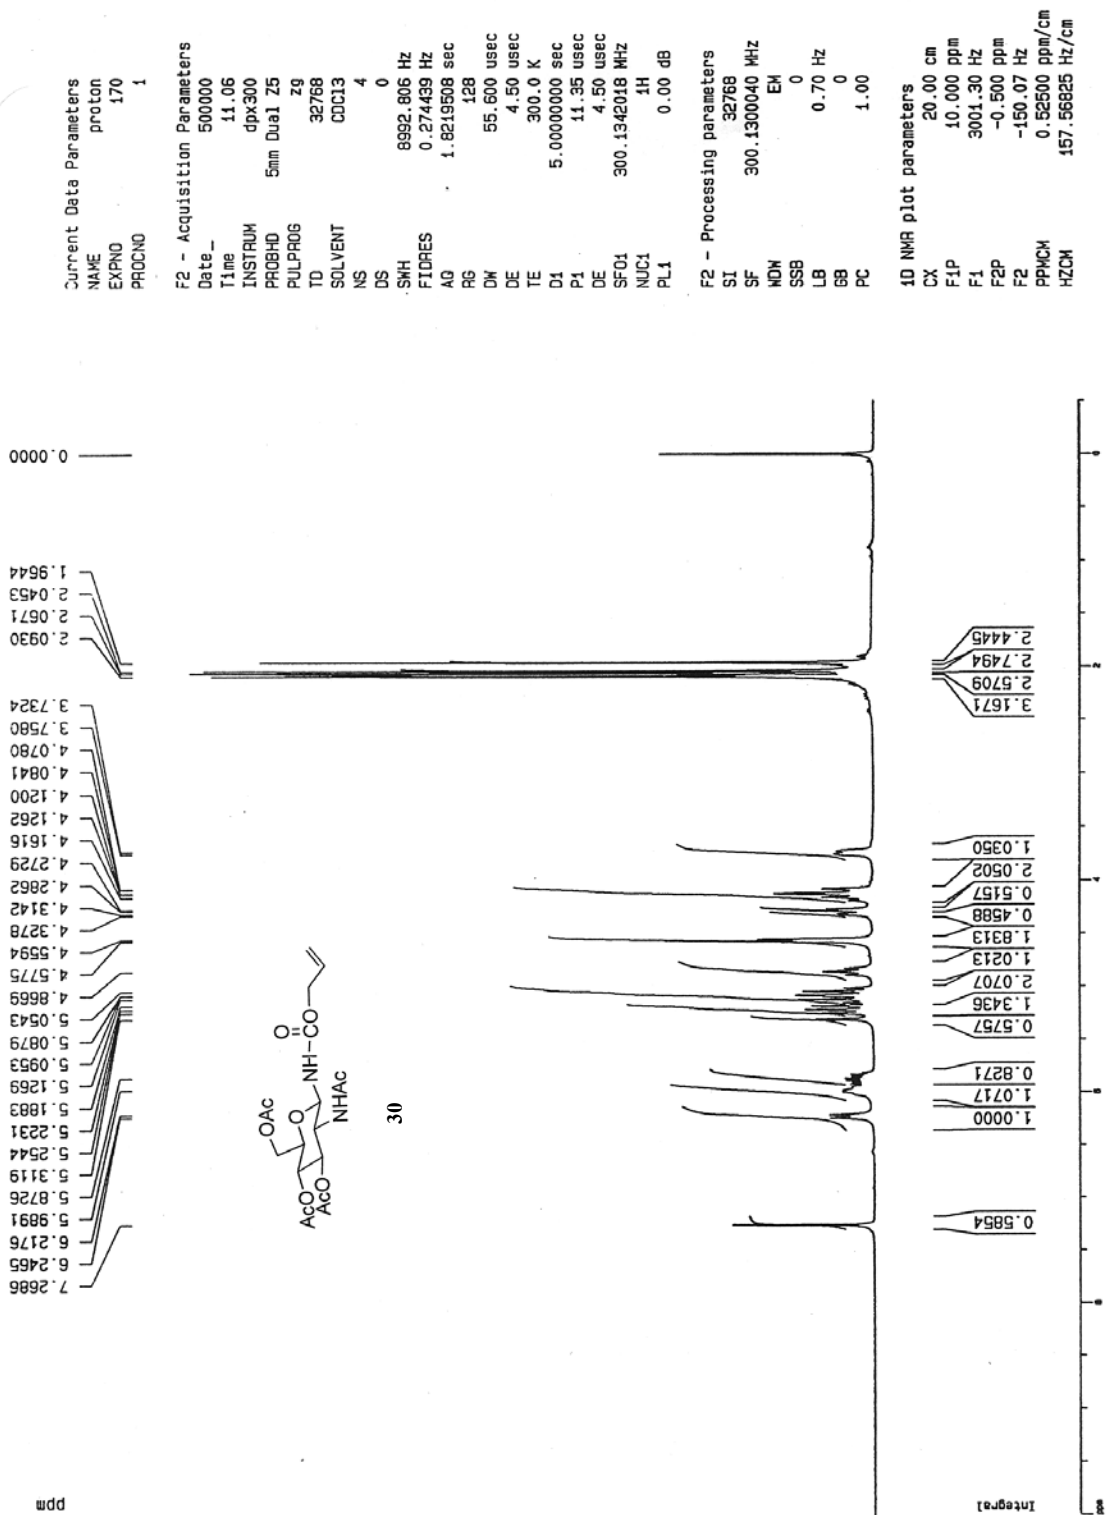

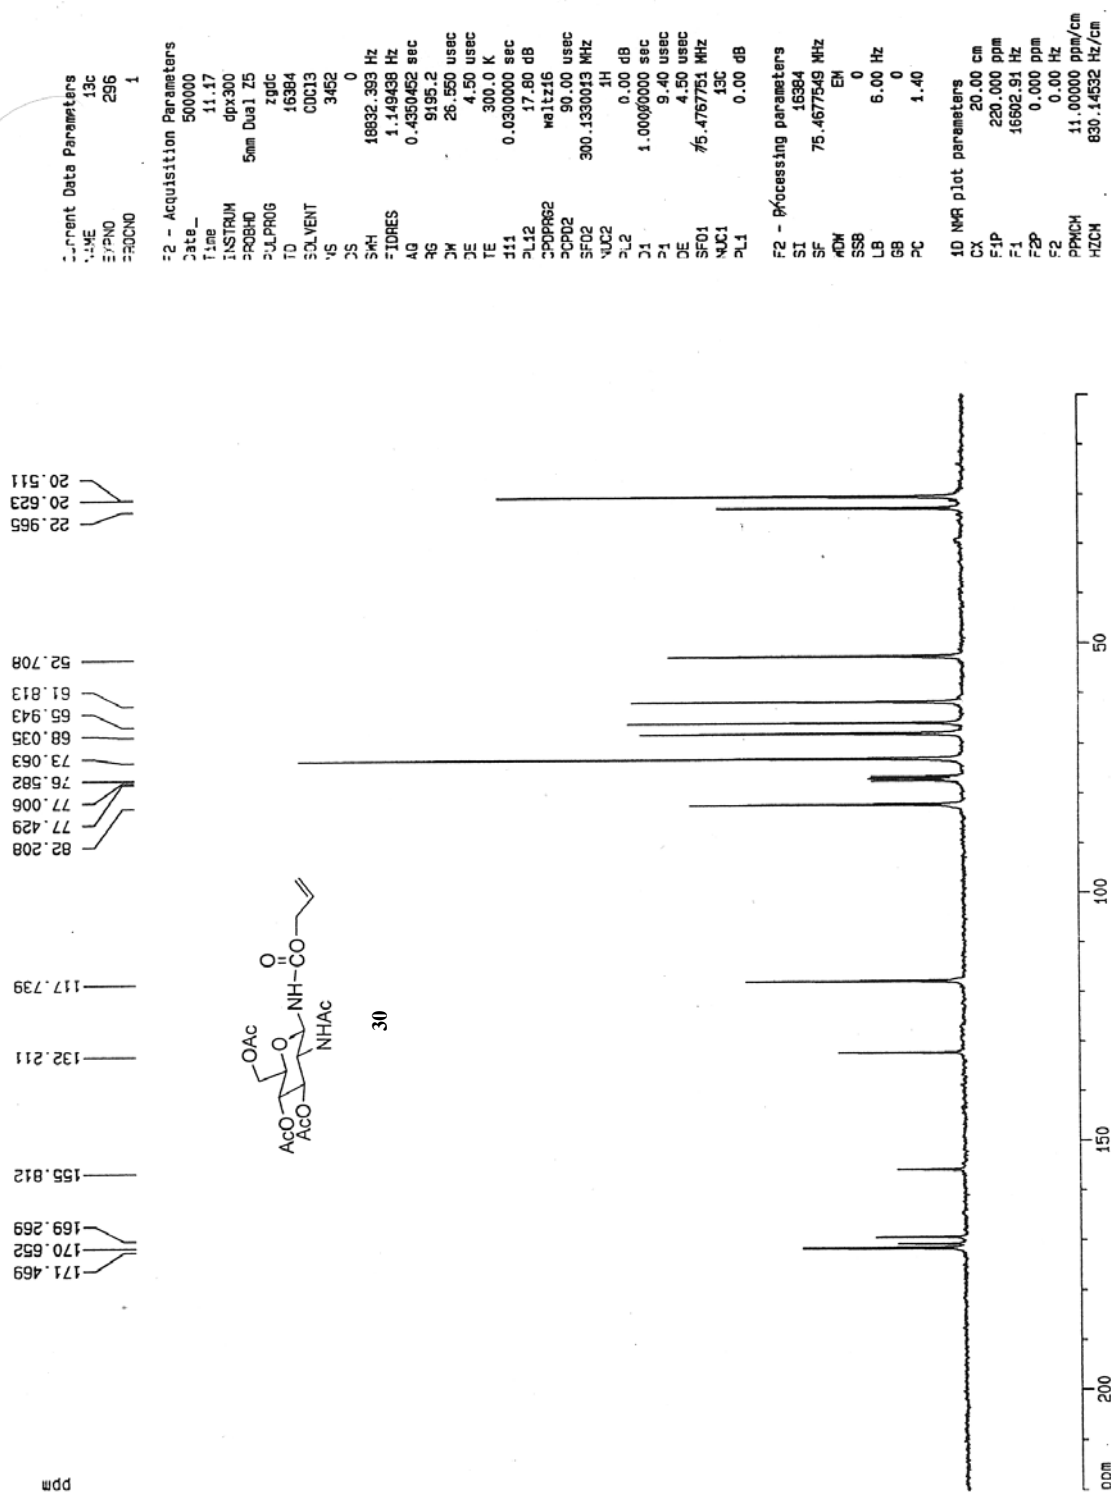

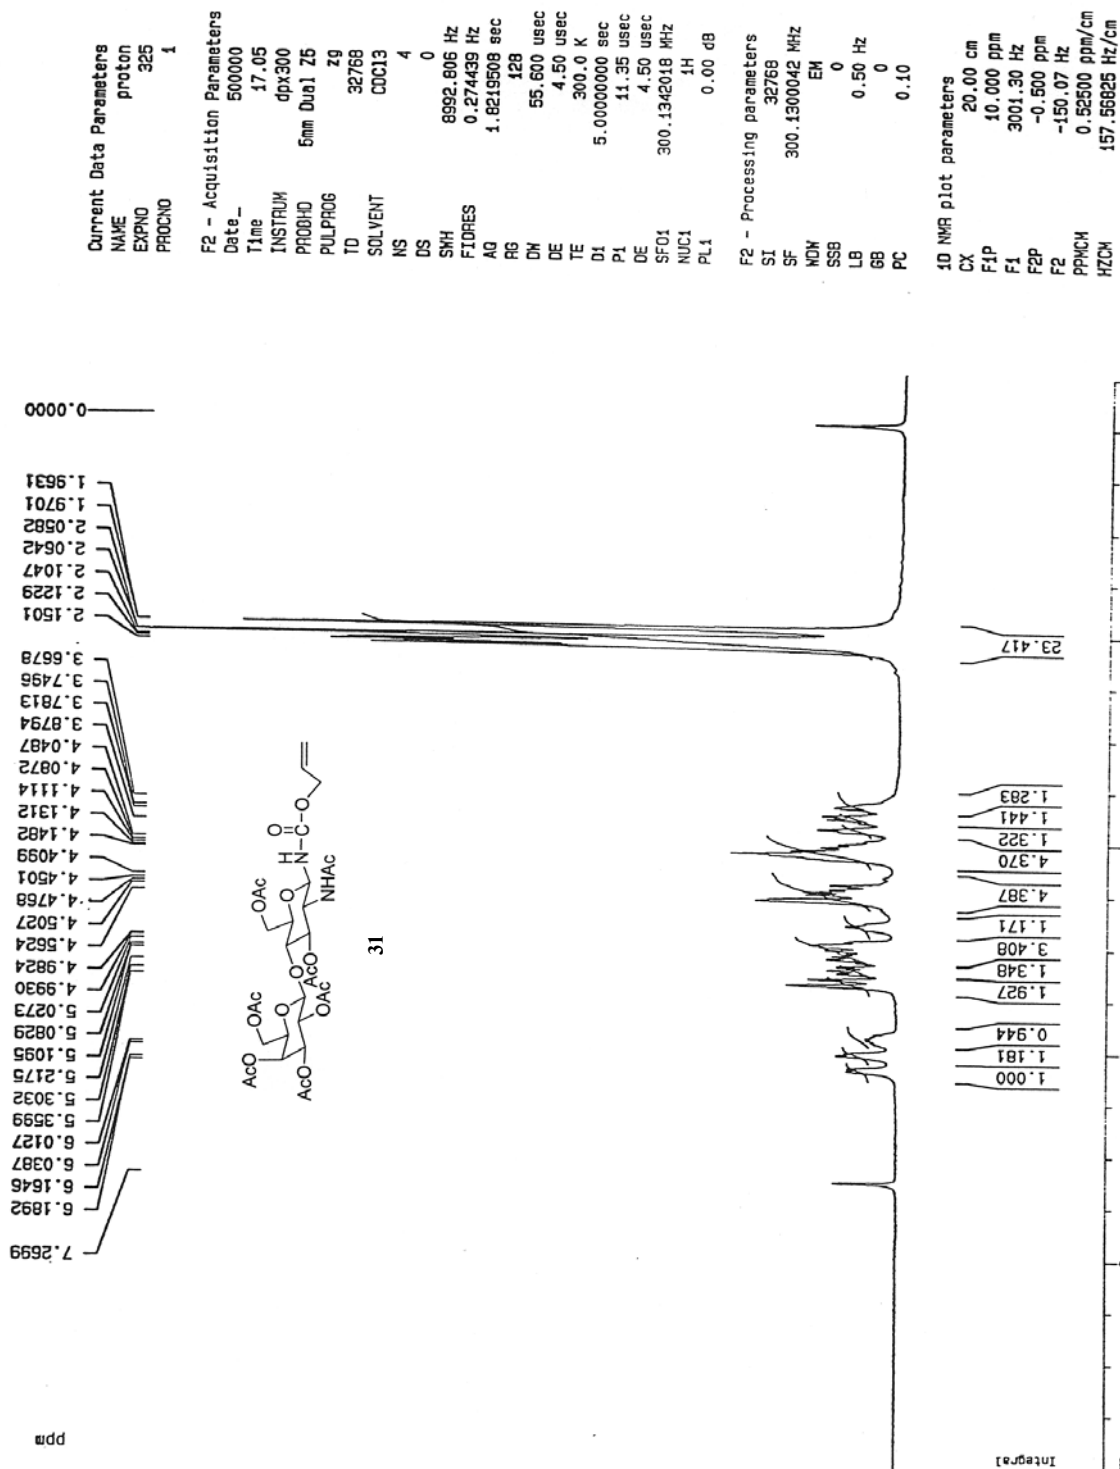

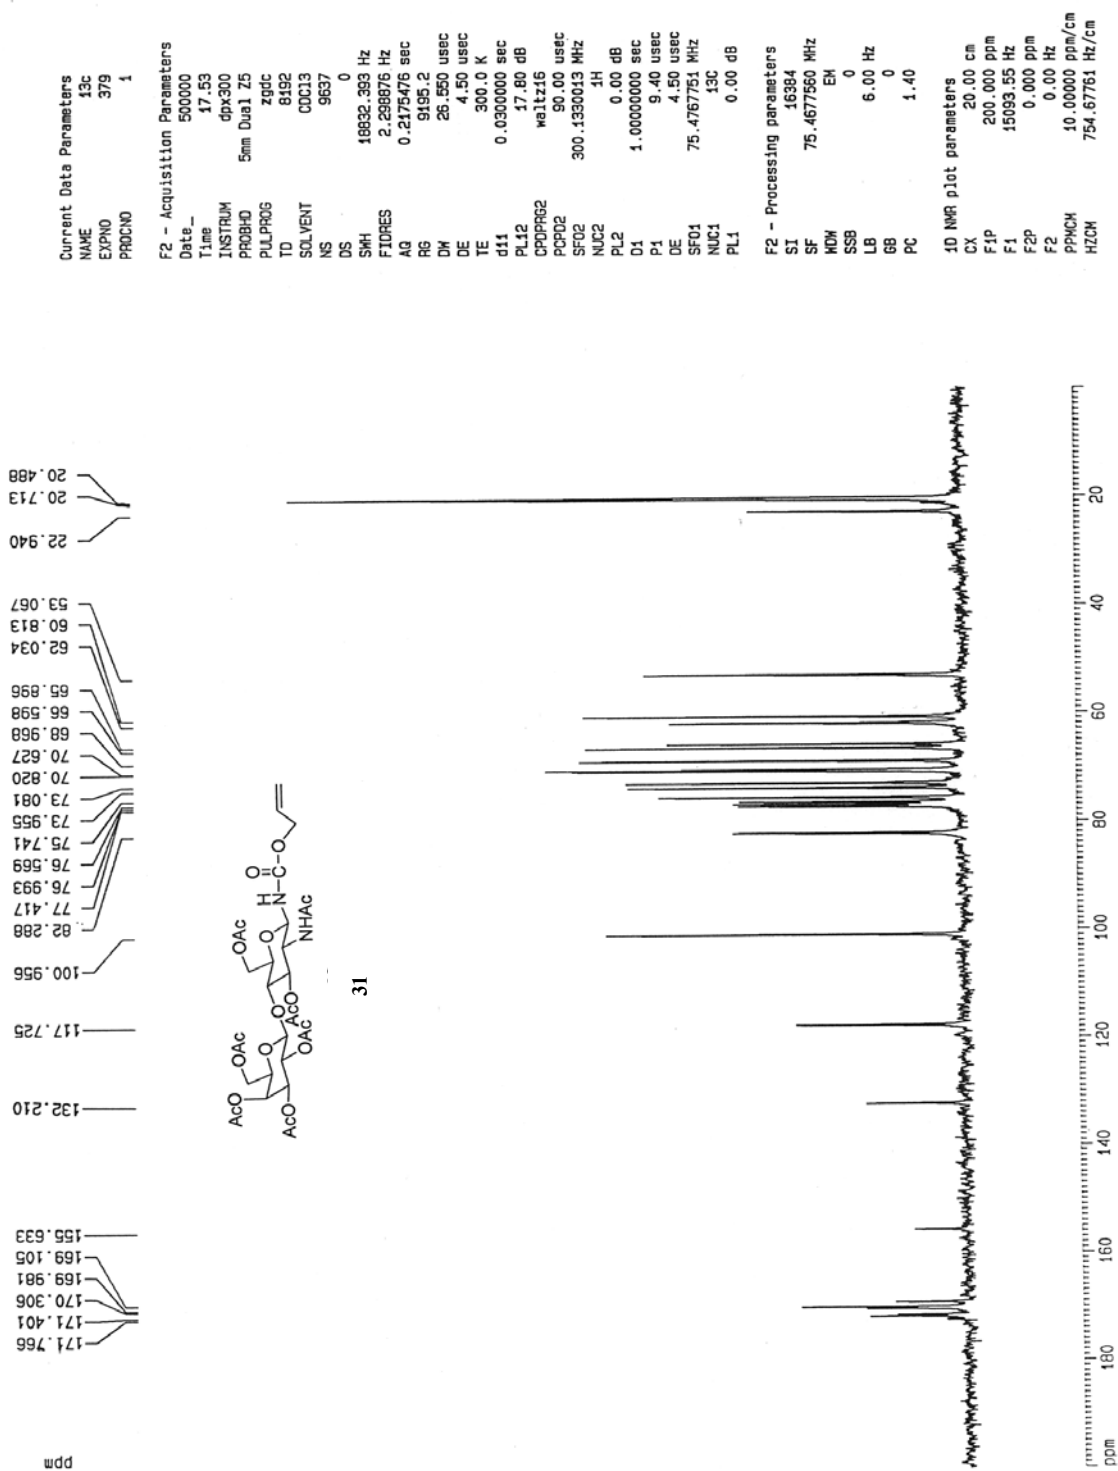

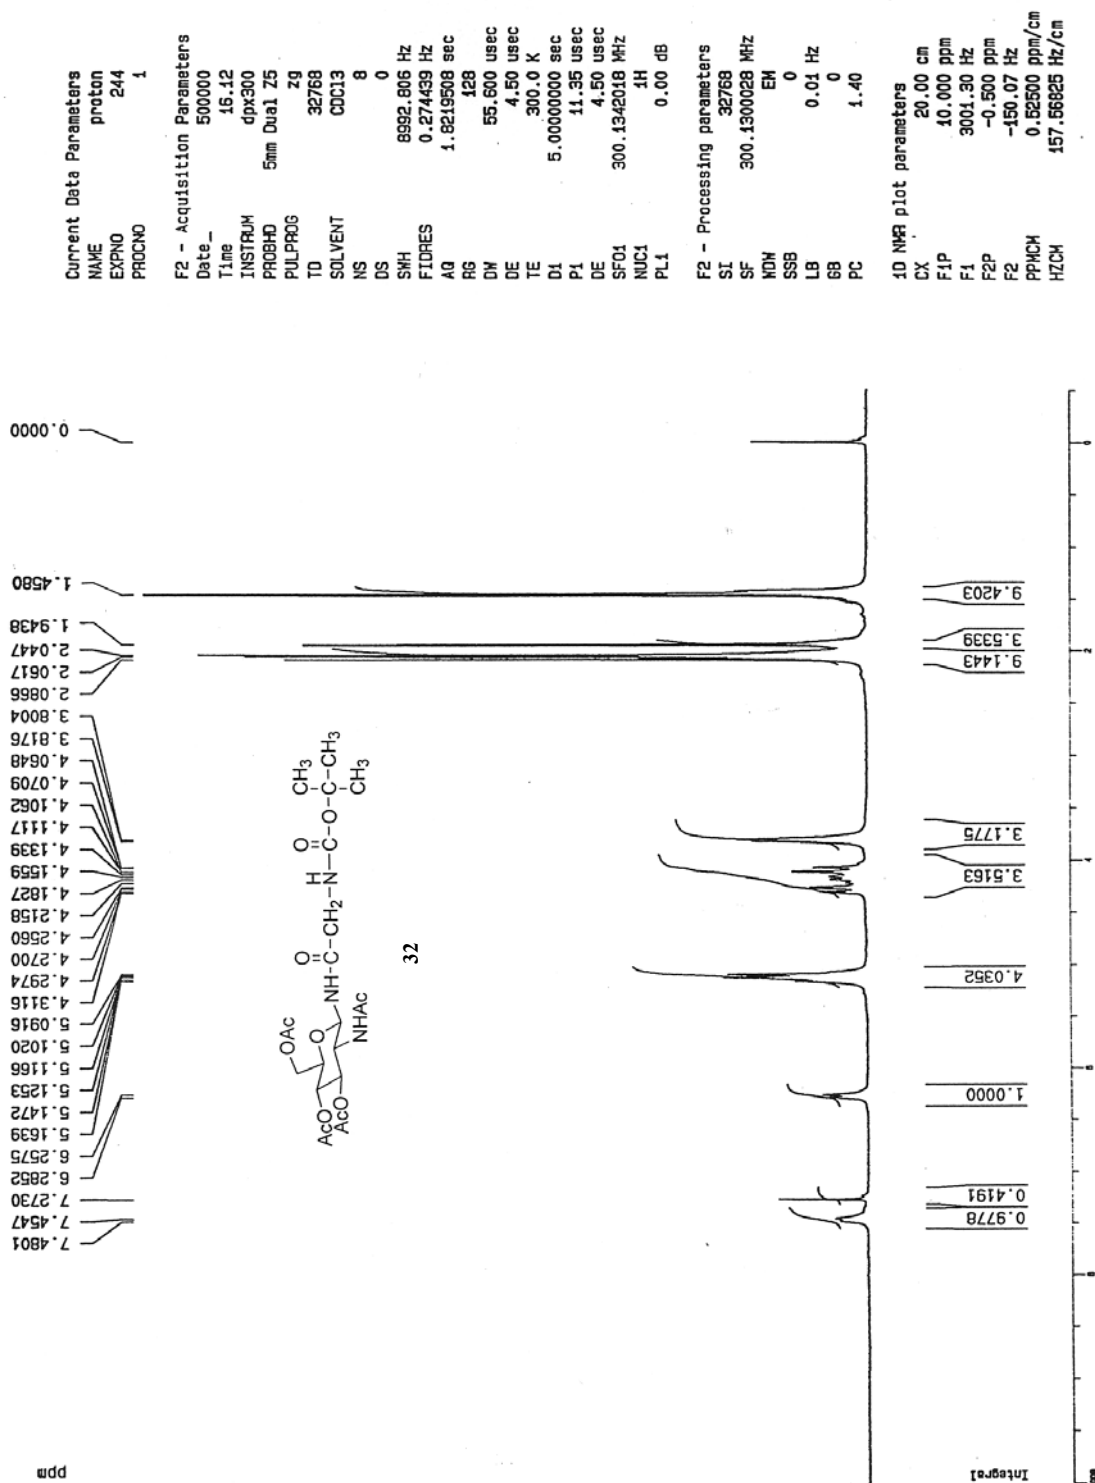

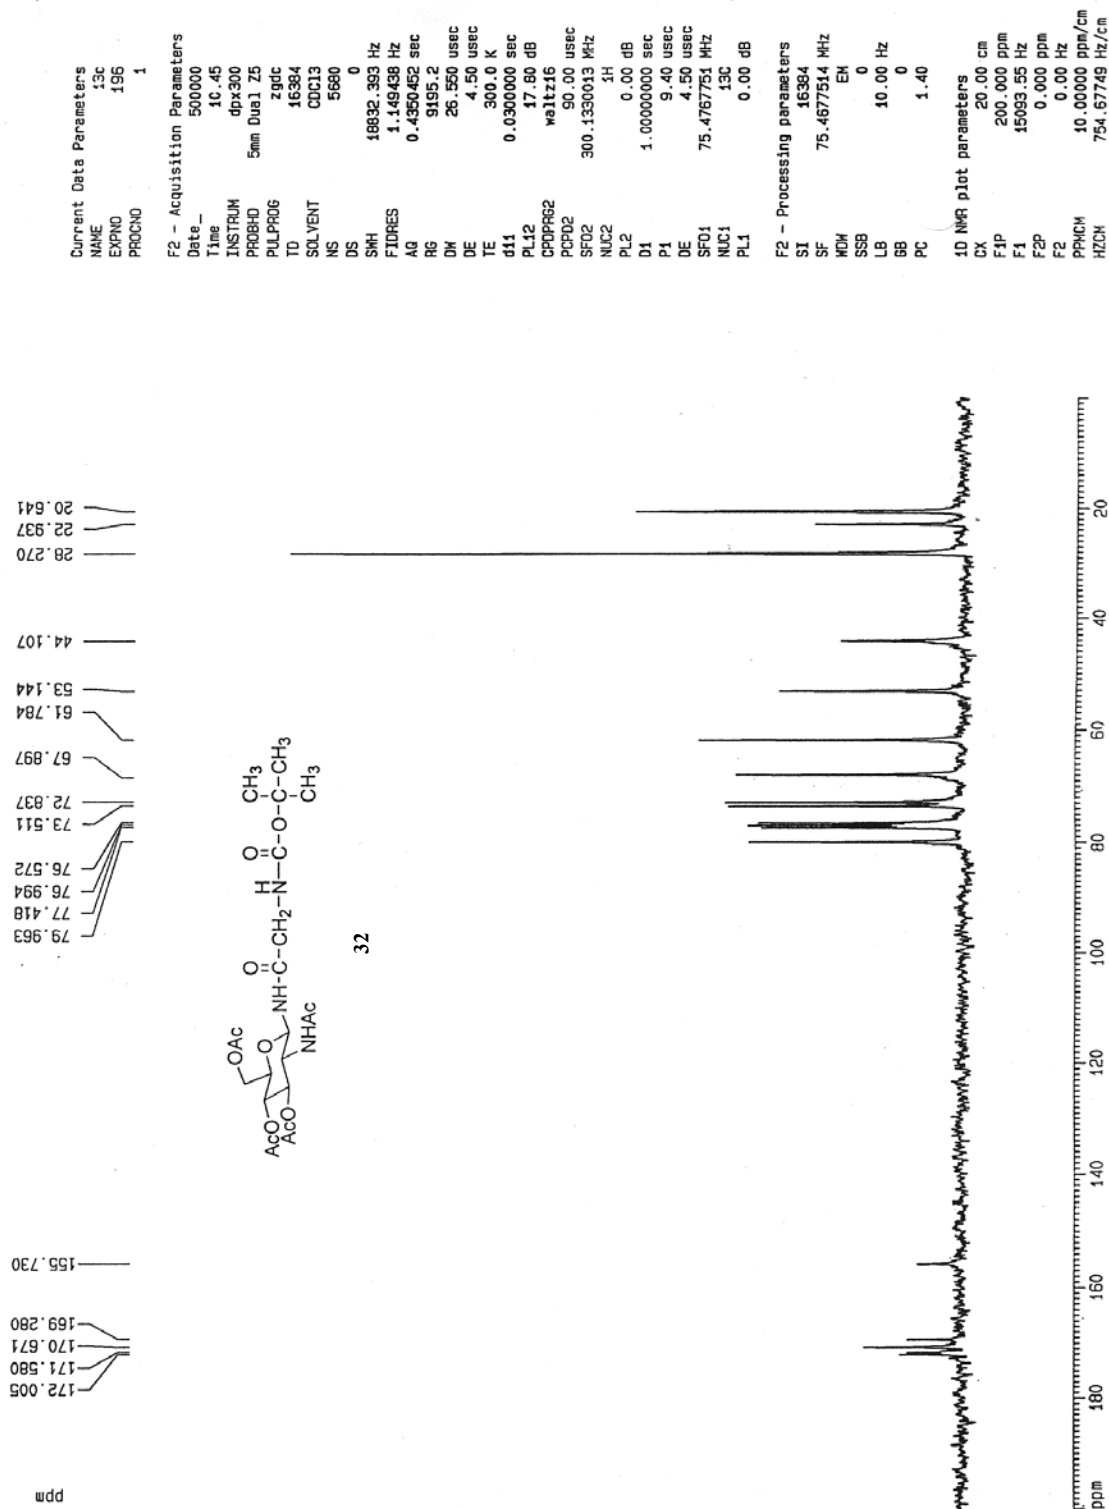

Supplement: b612151a.pdf [file b612151a.pdf]
